# Supplementary material for: Prognostic MRI features to predict postresection survivals for very early to intermediate stage hepatocellular carcinoma
Source: Springer Nature journal article supplement (doi:10.1007/s00330-023-10279-x), 2023-10-23
Supplement: MOESM1 [file 330_2023_10279_MOESM1_ESM.pdf]

---

**Prognostic MRI features to predict postresection survivals for very early to intermediate stage hepatocellular carcinoma**

**Electronic Supplementary Material**

**Table of contents**

|                                                                          |           |
|--------------------------------------------------------------------------|-----------|
| <b>Supplemental Material 1: Imaging acquisition protocols .....</b>      | <b>2</b>  |
| <b>Supplemental Table 2: Definitions of the imaging predictors .....</b> | <b>8</b>  |
| <b>Supplemental Figures .....</b>                                        | <b>14</b> |

---

## Supplemental Material 1: Imaging acquisition protocols

All contrast-enhanced MR images were acquired on one of the following 3.0 T or 1.5 T MR systems (Siemens MAGNETOM Skyra 3.0 T; Siemens TrioTim 3.0 T; Siemens Avanto 1.5 T; GE SIGNA™ Architect 3.0 T; GE SIGNA™ Premier 3.0 T; GE Discovery MR 750 3.0 T; Philips Ingenia Elition X 3.0 T; uMR588 1.5 T) using either extracellular contrast-enhanced MRI (ECA-MRI) or gadoxetate disodium-enhanced MRI (EOB-MRI). For acquisition of ECA-MRI, 0.1 mmol/kg of gadopentetate dimeglumine (Magnevist®; Bayer Schering Pharma AG), gadoterate meglumine (Dotarem®; Guerbet), or gadobenate dimeglumine (MultiHance®; Bracco) was injected at a rate of 2.5 ml/s. For acquisition of EOB-MRI, 0.025 mmol/kg of EOB (Primovist®; Bayer Schering Pharma AG or XianAi®; Chia Tai TianQing Pharmaceutical Co., Ltd) was injected at a rate of 1.0-2.0 ml/s.

All patients were asked to fast for 6-8 hours before MR examinations. The MRI sequences included: (a) T2-weighted imaging; (b) diffusion-weighted imaging (b values: 0, 50, 500, 800, 1000, and 1200 s/mm<sup>2</sup> [Siemens MAGNETOM Skyra]; 0, 50, 800 s/mm<sup>2</sup> [Siemens TrioTim; Siemens Avanto]; 0, 50, 1000 s/mm<sup>2</sup> [Siemens Avanto; GE SIGNA™ Architect; GE SIGNA™ Premier; uMR588]; 0, 200, 800, and 1000 s/mm<sup>2</sup> [GE Discovery MR 750]; 0, 200, 1000 s/mm<sup>2</sup> [Philips Ingenia Elition X]) with apparent diffusion coefficient maps reconstructed using the monoexponential model; (c) in- and opposed-phase T1-weighted imaging; and (d) dynamic T1-weighted imaging in the pre-contrast phase, late arterial phase, portal venous phase (60 s after the start of contrast media injection), delayed phase (for ECA-MRI, 3min after start of contrast media injection) or transitional phase (for EOB-MRI, 5min after the start of contrast media injection), and hepatobiliary phase (for EOB-MRI, 20min after the start of contrast media injection). The arterial phase images were acquired with either a bolus-tracking method (acquisition triggered 7s after the arrival of the contrast bolus in the celiac trunk) or a multiple arterial phase imaging technique (acquired with an 18 s-breath-hold 20s after the start of contrast media injection and further reconstructed with a temporal resolution of 3 s).

MR acquisition parameters are detailed in **Supplemental Table 1**.

**Supplemental Table 1. MR Sequences and Parameters**

| <b>Sequence</b>                                                      | <b>Fat suppression</b> | <b>TR (ms)</b> | <b>TE (ms)</b> | <b>Flip angle (°)</b> | <b>ST (mm)</b> | <b>Spacing (mm)</b> | <b>Matrix size</b> | <b>FOV (mm<sup>2</sup>)</b> | <b>Acquisition Time (s)</b> |
|----------------------------------------------------------------------|------------------------|----------------|----------------|-----------------------|----------------|---------------------|--------------------|-----------------------------|-----------------------------|
| <b>Siemens MAGNETOM Skyra 3.0 Tesla (18-channel body array coil)</b> |                        |                |                |                       |                |                     |                    |                             |                             |
| T2-weighted 2D FSE                                                   | Yes                    | 2160           | 100            | 160                   | 6              | 1.8                 | 320×288            | 433×433                     | 36                          |
| Diffusion-weighted imaging*                                          | Yes                    | 5600           | 68             | 90                    | 6              | 1.8                 | 100×76             | 380×289                     | 233                         |
| In- and opposed-phase T1-weighted imaging                            | No                     | 81             | 2.72/1.4       | 70                    | 6              | 1.8                 | 352×286            | 400×325                     | 24                          |
| Dynamic T1-weighted 3D GRE                                           | Yes                    | 3.95           | 1.92           | 9                     | 2.5            | -                   | 352×256            | 400×296                     | 14                          |
| <b>Siemens TrioTim 3.0 Tesla (8-channel body anterior coil)</b>      |                        |                |                |                       |                |                     |                    |                             |                             |
| T2-weighted 2D FSE                                                   | Yes                    | 2700           | 95             | 140                   | 6              | 7.8                 | 320×147            | 442×254                     | Respiratory gating          |
| Diffusion-weighted imaging*                                          | Yes                    | 5900           | 76             | 90                    | 6              | 7.8                 | 192×154            | 393×393                     | 245                         |
| In- and opposed-phase T1-weighted imaging                            | No                     | 181            | 2.2/1.1        | 65                    | 6              | 7.8                 | 256×131            | 410×269                     | 18                          |
| Dynamic T1-weighted 3D GRE                                           | Yes                    | 3.47           | 1.25           | 9                     | 2.4            | -                   | 320×133            | 434×257                     | 17                          |

Note. —TR = repetition time; TE = echo time; ST = section thickness; FOV = field of view; 2D = two-dimensional; 3D = three-dimensional; FSE = fast spin-echo; GRE = gradient recall echo. \* Images were acquired under free breath.

| <b>Sequence</b>                                                 | <b>Fat suppression</b> | <b>TR (ms)</b> | <b>TE (ms)</b> | <b>Flip angle (°)</b> | <b>ST (mm)</b> | <b>Spacing (mm)</b> | <b>Matrix size</b> | <b>FOV (mm<sup>2</sup>)</b> | <b>Acquisition Time (s)</b> |
|-----------------------------------------------------------------|------------------------|----------------|----------------|-----------------------|----------------|---------------------|--------------------|-----------------------------|-----------------------------|
| <b>Siemens Avanto 1.5 Tesla (30-channel body anterior coil)</b> |                        |                |                |                       |                |                     |                    |                             |                             |
| T2-weighted 2D FSE                                              | Yes                    | 2530           | 84             | 150                   | 6              | 7.8                 | 256×187            | 293×251                     | 47                          |
| Diffusion-weighted imaging*                                     | Yes                    | 3600           | 88             | 90                    | 6              | 7.8                 | 192×115            | 310×232                     | 92                          |
| In- and opposed-phase T1-weighted imaging                       | No                     | 72             | 4.92/2.22      | 70                    | 6              | 7.8                 | 256×158            | 328×225                     | 16                          |
| Dynamic T1-weighted 3D GRE                                      | Yes                    | 5.41           | 2.39           | 10                    | 2.5            | -                   | 320×138            | 382×238                     | 15                          |
| <b>Siemens Avanto 1.5 Tesla (8-channel body anterior coil)</b>  |                        |                |                |                       |                |                     |                    |                             |                             |
| T2-weighted 2D FSE                                              | Yes                    | 2710           | 84             | 150                   | 7.5            | 9.75                | 256×177            | 308×380                     | 27                          |
| Diffusion-weighted imaging*                                     | Yes                    | 2000           | 72             | 90                    | 7.5            | 9.75                | 192×125            | 308×379                     | 20                          |
| In- and opposed-phase T1-weighted imaging                       | No                     | 87             | 4.92/2.22      | 70                    | 7.5            | 9.75                | 256×187            | 308×380                     | 33                          |
| Dynamic T1-weighted 3D GRE                                      | Yes                    | 5.4            | 2.38           | 10                    | 2              | -                   | 320×131            | 241×407                     | 15                          |

Note. —TR = repetition time; TE = echo time; ST = section thickness; FOV = field of view; 2D = two-dimensional; 3D = three-dimensional; FSE = fast spin-echo; GRE = gradient recall echo. \* Images were acquired under free breath.

| <b>Sequence</b>                                                      | <b>Fat suppression</b> | <b>TR (ms)</b> | <b>TE (ms)</b> | <b>Flip angle (°)</b> | <b>ST (mm)</b> | <b>Spacing (mm)</b> | <b>Matrix size</b> | <b>FOV (mm<sup>2</sup>)</b> | <b>Acquisition Time (s)</b> |
|----------------------------------------------------------------------|------------------------|----------------|----------------|-----------------------|----------------|---------------------|--------------------|-----------------------------|-----------------------------|
| <b>GE SIGNA™ Architect 3.0 Tesla (30-channel body anterior coil)</b> |                        |                |                |                       |                |                     |                    |                             |                             |
| T2-weighted 2D FSE                                                   | Yes                    | 2400           | 85             | 111                   | 7              | 2                   | 320×192            | 380×304                     | 34                          |
| Diffusion-weighted imaging*                                          | Yes                    | 5000           | Minimum        | 90                    | 7              | 2                   | 160×128            | 380×342                     | Respiratory gating          |
| In- and opposed-phase T1-weighted imaging                            | No                     | 233.8          | 2.3/1.1        | 55                    | 7              | 2                   | 160×288            | 380×323                     | 18                          |
| Dynamic T1-weighted 3D GRE                                           | Yes                    | 3.9            | 1.7            | 15                    | 3              | -                   | 320×240            | 380×380                     | 15                          |
| <b>GE SIGNA™ Premier 3.0 Tesla (30-channel body anterior coil)</b>   |                        |                |                |                       |                |                     |                    |                             |                             |
| T2-weighted 2D FSE                                                   | Yes                    | 2200           | 85             | 111                   | 7              | 2                   | 320×224            | 304×380                     | 47                          |
| Diffusion-weighted imaging*                                          | Yes                    | 5000           | Minimum        | 90                    | 7              | 2                   | 120 x 240          | 380x 380                    | Respiratory gating          |
| In- and opposed-phase T1-weighted imaging                            | No                     | 146.8          | 2.3/1.1        | 55                    | 7              | 2                   | 320×192            | 342×380                     | 16                          |
| Dynamic T1-weighted 3D GRE                                           | Yes                    | 3.2            | 1.4            | 15                    | 2.4            | -                   | 320×240            | 380x 380                    | 15                          |

Note. —TR = repetition time; TE = echo time; ST = section thickness; FOV = field of view; 2D = two-dimensional; 3D = three-dimensional; FSE = fast spin-echo; GRE = gradient recall echo. \* Images were acquired under free breath.

| <b>Sequence</b>                                                            | <b>Fat suppression</b> | <b>TR (ms)</b> | <b>TE (ms)</b> | <b>Flip angle (°)</b> | <b>ST (mm)</b> | <b>Spacing (mm)</b> | <b>Matrix size</b> | <b>FOV (mm<sup>2</sup>)</b> | <b>Acquisition Time (s)</b> |
|----------------------------------------------------------------------------|------------------------|----------------|----------------|-----------------------|----------------|---------------------|--------------------|-----------------------------|-----------------------------|
| <b>GE Discovery MR 750 3.0 Tesla (16-channel phased-array torso coil)</b>  |                        |                |                |                       |                |                     |                    |                             |                             |
| T2-weighted 2D FSE                                                         | Yes                    | 6315           | 78             | 111                   | 6              | 2                   | 288x244            | 360x280                     | Respiratory gating          |
| Diffusion-weighted imaging*                                                | Yes                    | 9230           | Minimum        | 90                    | 6              | 2                   | 128 x 128          | 360x 380                    | Respiratory gating          |
| In- and opposed-phase T1-weighted imaging                                  | No                     | 150            | 2.5/1.3        | 70                    | 6              | 2                   | 288x192            | 420x420                     | 31                          |
| Dynamic T1-weighted 3D GRE                                                 | Yes                    | 4.1            | 1.9            | 15                    | 2              | -                   | 512x512            | 380x 300                    | 15                          |
| <b>Philips Ingenia Elition X 3.0 Tesla (16-channel body anterior coil)</b> |                        |                |                |                       |                |                     |                    |                             |                             |
| T2-weighted 2D FSE                                                         | Yes                    | 1883.51        | 90             | 90                    | 6.8            | 8.5                 | 272x78             | 239x69                      | 46                          |
| Diffusion-weighted imaging*                                                | Yes                    | 1653.65        | 60.29          | 90                    | 7              | 8.5                 | 142x140            | 141x139                     | 52                          |
| In- and opposed-phase T1-weighted imaging                                  | No                     | 164.53         | 2.30/1.15      | 50                    | 6              | 7.5                 | 256x201            | 206x162                     | 11                          |
| Dynamic T1-weighted 3D GRE                                                 | Yes                    | 4.20           | 0.00           | 10                    | 3              | 1.5                 | 344x252            | 303x222                     | 13                          |

Note. —TR = repetition time; TE = echo time; ST = section thickness; FOV = field of view; 2D = two-dimensional; 3D = three-dimensional; FSE = fast spin-echo; GRE = gradient recall echo. \* Images were acquired under free breath.

| <b>Sequence</b>                                        | <b>Fat suppression</b> | <b>TR (ms)</b> | <b>TE (ms)</b> | <b>Flip angle (°)</b> | <b>ST (mm)</b> | <b>Spacing (mm)</b> | <b>Matrix size</b> | <b>FOV (mm<sup>2</sup>)</b> | <b>Acquisition Time (s)</b> |
|--------------------------------------------------------|------------------------|----------------|----------------|-----------------------|----------------|---------------------|--------------------|-----------------------------|-----------------------------|
| <b>uMR588 1.5 Tesla (6-channel body anterior coil)</b> |                        |                |                |                       |                |                     |                    |                             |                             |
| T2-weighted 2D FSE                                     | Yes                    | 2600           | 99.2           | 90                    | 6.5            | 1.5                 | 256×168            | 427×320                     | 39                          |
| Diffusion-weighted imaging*                            | Yes                    | 3350           | 77             | 90                    | 6.5            | 10                  | 128×92             | 320×400                     | Respiratory gating          |
| In- and opposed-phase T1-weighted imaging              | No                     | 117.6          | 4.7/2.27       | 60                    | 6.5            | 1.3                 | 256×174            | 320×400                     | 29                          |
| Dynamic T1-weighted 3D GRE                             | Yes                    | 4.2            | 1.88           | 10                    | 2.5            | -                   | 256×154            | 255×400                     | 13                          |

Note. —TR = repetition time; TE = echo time; ST = section thickness; FOV = field of view; 2D = two-dimensional; 3D = three-dimensional; FSE = fast spin-echo; GRE = gradient recall

echo. \* Images were acquired under free breath.

**Supplemental Table 2: Definitions of the imaging predictors**

| <b>Imaging features</b>                                        | <b>Definition</b>                                                                                                                                                                                                                                       | <b>Image sequence</b>                                                                                              |
|----------------------------------------------------------------|---------------------------------------------------------------------------------------------------------------------------------------------------------------------------------------------------------------------------------------------------------|--------------------------------------------------------------------------------------------------------------------|
| <b><i>LI-RADS major features</i></b>                           |                                                                                                                                                                                                                                                         |                                                                                                                    |
| Nonrim arterial phase hyperenhancement<br>(present vs. absent) | Nonrim-like enhancement of the tumor in the arterial phase unequivocally greater in whole or in part than the liver. (1,2)                                                                                                                              | Late arterial phase                                                                                                |
| Nonperipheral washout<br>(present vs. absent)                  | Nonperipheral visually assessed temporal reduction in the enhancement of the tumor in whole or in part relative to composite liver tissue in the portal venous phase or delayed phase. (1,2)                                                            | Portal venous or delayed phase for extracellular contrast agents or gadobenate; portal venous phase for gadoxetate |
| Enhancing capsule<br>(present vs. absent)                      | Smooth, uniform, sharp border around most or all of a tumor, unequivocally thicker or more conspicuous than fibrotic tissue around background nodules, and visible as enhancing rim in portal venous phase, delayed phase, or transitional phase. (1,2) | Portal venous, delayed, or transitional phase                                                                      |
| Tumor size (cm)                                                | Largest outer-edge-to-outer-edge dimension of a tumor. (1,2)                                                                                                                                                                                            | Pick the phase, sequence, plane in which the margins are clearest. Do not measure in arterial phase or DWI.        |
| <b><i>LI-RADS ancillary features</i></b>                       |                                                                                                                                                                                                                                                         |                                                                                                                    |
| Diffusion restriction<br>(present vs. absent)                  | Signal intensity of the tumor higher than the liver on diffusion-weighted images not caused only by T2 shine-through. (1,2)                                                                                                                             | High b value (e.g., ≥800) DWI                                                                                      |
| Mild-moderate T2 hyperintensity<br>(present vs. absent)        | Signal intensity of the tumor on T2WI higher than the liver, similar to or lower than a non-iron-overloaded spleen, and lower than simple fluid. (1,2)                                                                                                  | T2WI                                                                                                               |
| Corona enhancement<br>(present vs. absent)                     | Peritumoral enhancement in the late arterial phase or early portal venous phase. The enhancement is contiguous with and surrounds all or part of the tumor. (1,2)                                                                                       | Late arterial or early portal venous phase                                                                         |
| Nonenhancing capsule<br>(present vs. absent)                   | Subtype of capsule that does not show enhancement on any image. (1,2)                                                                                                                                                                                   | Multiple sequences                                                                                                 |
| Nodule-in-nodule architecture<br>(present vs. absent)          | Presence of smaller inner nodule within and having different imaging features than larger outer nodule. (1,2)                                                                                                                                           | Multiple sequences                                                                                                 |
| Mosaic architecture<br>(present vs. absent)                    | Presence of any combination of internal nodules, compartments, or septations, within a solid or mostly solid mass. (1,2)                                                                                                                                | Multiple sequences                                                                                                 |
| Blood products in mass<br>(present vs. absent)                 | Intralesional or perilesional hemorrhage in the absence of biopsy, trauma, or intervention. (1,2)                                                                                                                                                       | Multiple sequences                                                                                                 |
| Fat in mass, more than adjacent liver<br>(present vs. absent)  | Excess fat within a mass, in whole or in part, relative to the adjacent liver. (1,2)                                                                                                                                                                    | In-/opposed phase; fat-suppressed images compared to non-fat-suppressed images with similar or identical weighting |

|                                                                                        |                                                                                                                                                                                   |                                                                                                                    |
|----------------------------------------------------------------------------------------|-----------------------------------------------------------------------------------------------------------------------------------------------------------------------------------|--------------------------------------------------------------------------------------------------------------------|
| Fat sparing in solid mass<br>(present vs. absent)                                      | Relative paucity of fat in solid mass relative to steatotic liver OR in inner nodule relative to steatotic outer nodule. (1,2)                                                    | In-/opposed phase; fat-suppressed images compared to non-fat-suppressed images with similar or identical weighting |
| Iron sparing in solid mass<br>(present vs. absent)                                     | Paucity of iron in solid mass relative to iron-overloaded liver OR in inner nodule relative to siderotic outer nodule. (1,2)                                                      | In-/opposed phase; T2WI                                                                                            |
| Transitional phase hypointensity<br>(present vs. absent)                               | Signal intensity of the tumor in the transitional phase unequivocally less, in whole or in part, than the liver. (1,2)                                                            | Transitional phase                                                                                                 |
| Hepatobiliary phase hypointensity<br>(present vs. absent)                              | Signal intensity of the tumor in the hepatobiliary phase unequivocally less, in whole or in part, than the liver. (1,2)                                                           | Hepatobiliary phase                                                                                                |
| Marked T2 hyperintensity<br>(present vs. absent)                                       | Signal intensity of the tumor on T2WI higher than non-iron-overloaded spleen and as high as or almost as high as simple fluid. (1,2)                                              | T2WI                                                                                                               |
| Iron in mass, more than liver<br>(present vs. absent)                                  | Excess iron in a mass relative to the background liver. (1,2)                                                                                                                     | In-/opposed phase; T2WI                                                                                            |
| Parallels blood pool enhancement<br>(present vs. absent)                               | Temporal pattern in which enhancement approximates blood pool in all phases. (1,2)                                                                                                | Post-contrast phases                                                                                               |
| Undistorted vessels<br>(present vs. absent)                                            | Vessels traversing a tumor without displacement, deformation, or other alteration. (1,2)                                                                                          | Post-contrast phases                                                                                               |
| <b>LR-M features</b>                                                                   |                                                                                                                                                                                   |                                                                                                                    |
| Rim arterial phase hyperenhancement<br>(present vs. absent)                            | Spatially defined subtype of arterial phase hyperenhancement in which arterial phase enhancement is most pronounced in tumor periphery. (1,2)                                     | Late arterial phase                                                                                                |
| Peripheral washout<br>(present vs. absent)                                             | Presence of apparent washout most pronounced in the tumor periphery. (1,2)                                                                                                        | Portal venous or delayed phase for extracellular contrast agents or gadobenate; portal venous phase for gadoxetate |
| Delayed central enhancement<br>(present vs. absent)                                    | Central area of progressive postarterial phase enhancement. (1,2)                                                                                                                 | Postarterial phases                                                                                                |
| Targetoid restriction<br>(present vs. absent)                                          | Concentric pattern on diffusion-weighted imaging characterized by restricted diffusion in tumor periphery with less restricted diffusion in tumor center. (1,2)                   | DWI or ADC map                                                                                                     |
| Targetoid transitional phase or hepatobiliary phase appearance<br>(present vs. absent) | Concentric pattern in transitional or hepatobiliary phase characterized by moderate-to-marked hypointensity in the tumor periphery with milder hypointensity in the center. (1,2) | Transitional or hepatobiliary phase                                                                                |
| Marked diffusion restriction<br>(present vs. absent)                                   | Signal intensity of the tumor similar to or higher than non-iron-overloaded spleen on diffusion-weighted images not caused only by T2 shine-through. (1,2)                        | High b value (e.g., ≥800) DWI                                                                                      |

|                                                                        |                                                                                                                                                                                                                               |                               |
|------------------------------------------------------------------------|-------------------------------------------------------------------------------------------------------------------------------------------------------------------------------------------------------------------------------|-------------------------------|
| Infiltrative appearance (present vs. absent)                           | Presence of a non-circumscribed tumor margin (indistinct transition) thought to represent a permeative growth pattern. (1,2)                                                                                                  | Multiple sequences            |
| Necrosis or severe ischemia (present vs. absent)                       | Presence of nonenhancing area in a solid mass, not attributable to a cystic component, prior treatment, or intralesional hemorrhage. (1,2)                                                                                    | Post-contrast phases and T2WI |
| <b>Other tumor-related prognostic features</b>                         |                                                                                                                                                                                                                               |                               |
| Pre-contrast T1-weighted hypointensity (present vs. absent)            | Signal intensity of the tumor on pre-contrast T1-weighted imaging unequivocally lower than that of the liver.                                                                                                                 | Pre-contrast T1WI             |
| T2-weighted peritumoral hyperintensity (present vs. absent)            | Presence of irregular, wedge-shaped, or flame-like area adjacent to the tumor on T2WI of which the signal intensity is mildly or moderately higher than liver and similar to or less than a non-iron-overloaded spleen. (3,4) | T2WI                          |
| Portal venous phase peritumoral hypoenhancement (present vs. absent)   | Presence of irregular, wedge-shaped, or flame-like hypoenhancing area adjacent to the tumor in the portal venous phase. (3,4)                                                                                                 | Portal venous phase           |
| Markedly low apparent diffusion coefficient value (present vs. absent) | Apparent diffusion coefficient value of the tumor similar or lower than that of a non-iron-overloaded spleen.                                                                                                                 | ADC map                       |
| ≥50% arterial phase hyperenhancement (present vs. absent)              | Presence of ≥50% tumor volume demonstrating arterial phase hyperenhancement. (5)                                                                                                                                              | Late arterial phase           |
| Intratumoral artery (present vs. absent)                               | Presence of discrete arteries within the tumor on arterial phase images. (3,6,7)                                                                                                                                              | Early or late arterial phase  |
| Complete "capsule" (present vs. absent)                                | Presence of non-disrupted "capsule" in all imaging planes. (3,8)                                                                                                                                                              | Multiple sequences            |
| Non-smooth tumor margin (present vs. absent)                           | The tumor margin is irregular and/or has areas of bulging, nodular projection, or infiltration into adjacent tissues at the tumor periphery in any imaging plane. (3,7,10)                                                    | Multiple sequences            |
| Marked hepatobiliary phase hypointensity (present vs. absent)          | Signal intensity of the tumor in the hepatobiliary phase lower than that of the liver and similar to or lower than that of intrahepatic vessels. (11)                                                                         | Hepatobiliary phase           |
| Hepatobiliary phase peritumoral hypointensity (present vs. absent)     | Presence of irregular, wedge-shaped or flame-like hypointense area of liver parenchyma located outside of the tumor margin in the hepatobiliary phase. (3,4,11,12)                                                            | Hepatobiliary phase           |
| The VICT2 trait (present vs. absent)                                   | Presence of portal venous phase peritumoral hypoenhancement; or presence of corona enhancement, T2-weighted peritumoral hyperintensity coupled with absence of complete "capsule". (4)                                        | Multiple sequences            |
| The TTPVI trait (present vs. absent)                                   | Presence of intratumoral artery coupled with absence of nonenhancing "capsule". (6,7)                                                                                                                                         | Multiple sequences            |

|                                                                                                           |                                                                                                                                                                                                                                                                                                                                                                                                                                                                                                                                                                       |                                                                                                                    |
|-----------------------------------------------------------------------------------------------------------|-----------------------------------------------------------------------------------------------------------------------------------------------------------------------------------------------------------------------------------------------------------------------------------------------------------------------------------------------------------------------------------------------------------------------------------------------------------------------------------------------------------------------------------------------------------------------|--------------------------------------------------------------------------------------------------------------------|
| Tumor growth subtype (13,14)                                                                              |                                                                                                                                                                                                                                                                                                                                                                                                                                                                                                                                                                       | Multiple sequences                                                                                                 |
| Single nodular type                                                                                       | A round expanding nodule with a distinct margin in all imaging planes.                                                                                                                                                                                                                                                                                                                                                                                                                                                                                                |                                                                                                                    |
| Single nodule type with extranodular growth                                                               | An expanding nodule with areas of bulging or nodular extranodular projection involving less than 50% of tumor circumference.                                                                                                                                                                                                                                                                                                                                                                                                                                          |                                                                                                                    |
| Confluent multinodular type*†                                                                             | A cluster of small and confluent nodules.                                                                                                                                                                                                                                                                                                                                                                                                                                                                                                                             |                                                                                                                    |
| Infiltrative type†                                                                                        | Tumor with extranodular growth involving more than 50% of circumference.                                                                                                                                                                                                                                                                                                                                                                                                                                                                                              |                                                                                                                    |
| <b>Imaging features associated with tumor burden</b>                                                      |                                                                                                                                                                                                                                                                                                                                                                                                                                                                                                                                                                       |                                                                                                                    |
| Tumor number<br>(solitary vs. 2-3 tumors vs. over 3 tumors/solitary vs. multiple)                         | Number of unequivocal HCC, generally LR-5 or LR-4 (but occasionally LR-3 or LR-M). (1,11,15-18)                                                                                                                                                                                                                                                                                                                                                                                                                                                                       | Multiple sequences                                                                                                 |
| Satellite tumors*<br>(present vs. absent)                                                                 | Presence of separate unequivocal HCCs within 2 cm of the border of the dominant tumor.                                                                                                                                                                                                                                                                                                                                                                                                                                                                                | Multiple sequences                                                                                                 |
| <b>Imaging features associated with the severity of underlying liver diseases and portal hypertension</b> |                                                                                                                                                                                                                                                                                                                                                                                                                                                                                                                                                                       |                                                                                                                    |
| Ascites<br>(present vs. absent)                                                                           | Presence of free fluid in abdomen or pelvis. (19)                                                                                                                                                                                                                                                                                                                                                                                                                                                                                                                     | T2WI                                                                                                               |
| Radiologically-evident cirrhosis<br>(present vs. absent)                                                  | Unequivocal morphological alterations of the liver, including surface nodularity, small liver volume, expansion of space between liver and anterior abdominal wall and perihilar, gallbladder fossa and ligamentum teres spaces, hypertrophy of caudate and/or left lateral section, atrophy of anterior right section and/or left medial section, anterolateral flattening, notching of posterior medial right lobe and parenchymal nodules, with or without manifestations of portal hypertension (portal-systemic collaterals, splenomegaly and/or ascites). (1,2) | Multiple sequences                                                                                                 |
| Diffuse iron overload<br>(present vs. absent)                                                             | Diffuse signal intensity drop of the liver parenchyma on in-phase images compared with the opposed-phase images. (1,2)                                                                                                                                                                                                                                                                                                                                                                                                                                                | In-/opposed phase; T2WI                                                                                            |
| Diffuse fatty change<br>(present vs. absent)                                                              | Diffuse signal intensity drop of the liver parenchyma on opposed-phase images compared with the in-phase images. (1,2)                                                                                                                                                                                                                                                                                                                                                                                                                                                | In-/opposed phase; fat-suppressed images compared to non-fat-suppressed images with similar or identical weighting |
| Width of main portal vein (cm)                                                                            | Diameter of main portal vein, which is measured at least 1cm distal to the confluence of splenic and superior mesenteric vein and at least 1cm proximal to the first branch of the main portal vein, to avoid effect of convergence/divergence on coronal images. (20)                                                                                                                                                                                                                                                                                                | Coronal images of the portal venous or delayed phase                                                               |

|                                                    |                                                                                                                                                       |                                |
|----------------------------------------------------|-------------------------------------------------------------------------------------------------------------------------------------------------------|--------------------------------|
| Splenomegaly<br>(present vs. absent)               | Cranio-caudal diameter of the spleen > 12 cm. (19,21,22)                                                                                              | Multiple sequences             |
| Porto-systemic shunts<br>(present vs. absent)      | Enhancing tortuous channels in esophageal, epigastric, perisplenic, paraumbilical or retroperitoneal locations. (19)                                  | Portal venous or delayed phase |
| Esophageal gastric varices<br>(present vs. absent) | Discrete enhancing tortuous channel abutting the luminal surface of the esophageal or gastric wall or contacting/ protruding into luminal space. (19) | Portal venous or delayed phase |

\* The confluent multinodular subtype is different from satellite tumors as the former describes a cluster of small and confluent nodules, while the latter describes presence of separate unequivocal HCCs within 2 cm of the border of the dominant tumor.

† Tumor with the confluent multinodular or infiltrative type was considered solitary if no additional separate unequivocal HCC was identified, and the size measurement should encompass the entire confluent tumor cluster in the sequence/phase/plane that the margin is clearest.

## References:

1. CT/MRI Liver Imaging Reporting and Data System version 2018. American College of Radiology Web site. <https://www.acr.org/Clinical-Resources/Reporting-andData-Systems/LI-RADS/CTMRI-LI-RADS-v2018>. Accessed 1 September 2021.
2. LI-RADS Lexicon (terms and definitions). American College of Radiology Web site. <https://www.acr.org/-/media/ACR/Files/RADS/LI-RADS/LIRADS-Lexicon-Table.pdf>. Accessed 1 September 2021.
3. Jiang H, Wei J, Fu F, et al. Predicting microvascular invasion in hepatocellular carcinoma: a dual-institution study on gadoxetate disodium-enhanced MRI. *Liver Int.* 2022;42(5):1158-1172.
4. Jiang H, Wei H, Yang T, et al. VICT2 trait: prognostic alternative to peritumoral HBP hypointensity in hepatocellular carcinoma. *Radiology.* 2023 Feb 14:221835.
5. Rhee H, Cho ES, Nahm JH, et al. Gadoteric acid-enhanced MRI of macrotrabecular-massive hepatocellular carcinoma and its prognostic implications. *J Hepatol.* 2021;74(1):109-121.
6. Segal E, Sirlin CB, Ooi C, Adler AS, Gollub J, Chen X, et al. Decoding global gene expression programs in liver cancer by noninvasive imaging. *Nat Biotechnol* 2007; 25:675–680.
7. Renzulli M, Brocchi S, Cucchetti A, Mazzotti F, Mosconi C, Sportoletti C, et al. Can Current Preoperative Imaging Be Used to Detect Microvascular Invasion of Hepatocellular Carcinoma? *Radiology* 2016;279(2):432-442.
8. Lei Z, Li J, Wu D, Xia Y, Wang Q, Si A, et al. Nomogram for Preoperative Estimation of Microvascular Invasion Risk in Hepatitis B Virus-Related Hepatocellular Carcinoma Within the Milan Criteria. *JAMA* 2016;151(4):356-363.
9. Lee S, Kim SH, Lee JE, Sinn DH, Preoperative gadoteric acid-enhanced MRI for predicting microvascular invasion in patients with single hepatocellular carcinoma. *J Hepatol* 2017;67(3):526-534.
10. An C, Kim DW, Park YN, Chung YE, Rhee H, Kim MJ. Single hepatocellular carcinoma: preoperative MR imaging to predict early recurrence after curative resection. *Radiology* 2015; 276:433–443.
11. Fowler KJ, Chernyak V, Ronot M, et al. Hepatocellular Carcinoma: It Is Time to Focus on Prognosis. *Radiology.* 2023:220884.
12. Lee S, Kim SH, Lee JE, Sinn DH, Preoperative gadoteric acid-enhanced MRI for predicting microvascular invasion in patients with single hepatocellular carcinoma. *J Hepatol* 2017;67(3):526-534.
13. Rhee H, Chung T, Yoo JE, et al. Gross type of hepatocellular carcinoma reflects the tumor hypoxia, fibrosis, and stemness-related marker expression. *Hepatol Int.* 2020;14(2):239-248.
14. Burt AD, Alves V, Bedossa P, et al. Data set for the reporting of intrahepatic cholangiocarcinoma, perihilar cholangiocarcinoma and hepatocellular carcinoma: recommendations from the International Collaboration on Cancer Reporting (ICCR). *Histopathology.* 2018;73:369–85.
15. General Office of National Health Commission. Standard for diagnosis and treatment of primary liver cancer (2022 edition). *J Clin Hepatol.* 38 (2), 306-321.
16. European Association for the Study of the Liver; European Association for the Study of the Liver. EASL Clinical Practice Guidelines: Management of hepatocellular carcinoma. *J Hepatol* 2018;69(1):182-236.
17. Omata M, Cheng AL, Kokudo N, Kudo M, Lee JM, Jia J, et al. Asia-Pacific clinical practice guidelines on the management of hepatocellular carcinoma: a 2017 update. *Hepatol Int* 2017;11(4):317-370.

- 
18. Marrero JA, Kulik LM, Sirlin CB, Zhu AX, Finn RS, Abecassis MM, et al. Diagnosis, Staging, and Management of Hepatocellular Carcinoma: 2018 Practice Guidance by the American Association for the Study of Liver Diseases. *Hepatology*. 2018;68(2):723-750.
  19. Venkatesh SK, Yin M, Takahashi N, et al. Non-invasive detection of liver fibrosis: MR imaging features vs. MR elastography. *Abdom Imaging*. 2015;40(4):766-75.
  20. Stamm ER, Meier JM, Pokharel SS, et al. Normal main portal vein diameter measured on CT is larger than the widely referenced upper limit of 13 mm. *Abdom Radiol (NY)*. 2016;41(10):1931-6.
  21. Rustogi R, Horowitz J, Harmath C, et al. Accuracy of MR elastography and anatomic MR imaging features in the diagnosis of severe hepatic fibrosis and cirrhosis. *J Magn Reson Imaging*. 2012;35(6):1356-64.
  22. Marasco G, Colecchia A, Colli A, et al. Role of liver and spleen stiffness in predicting the recurrence of hepatocellular carcinoma after resection. *J Hepatol*. 2019;70(3):440-448.

## Supplemental Figures

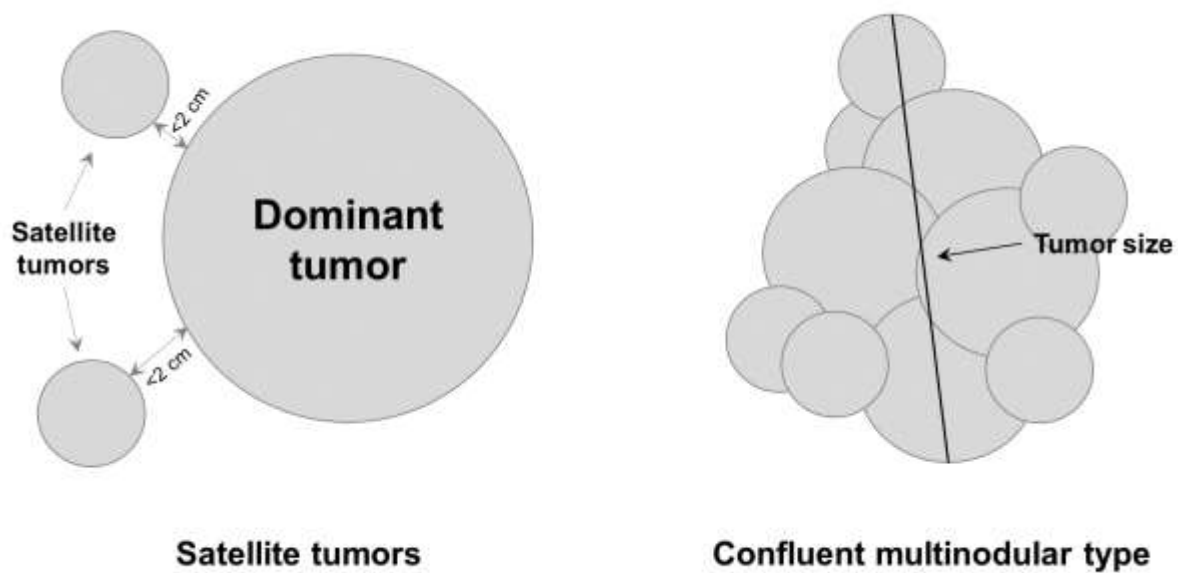

**Supplemental Figure 1.** Graphical comparisons of satellite tumors and the confluent multinodular type.

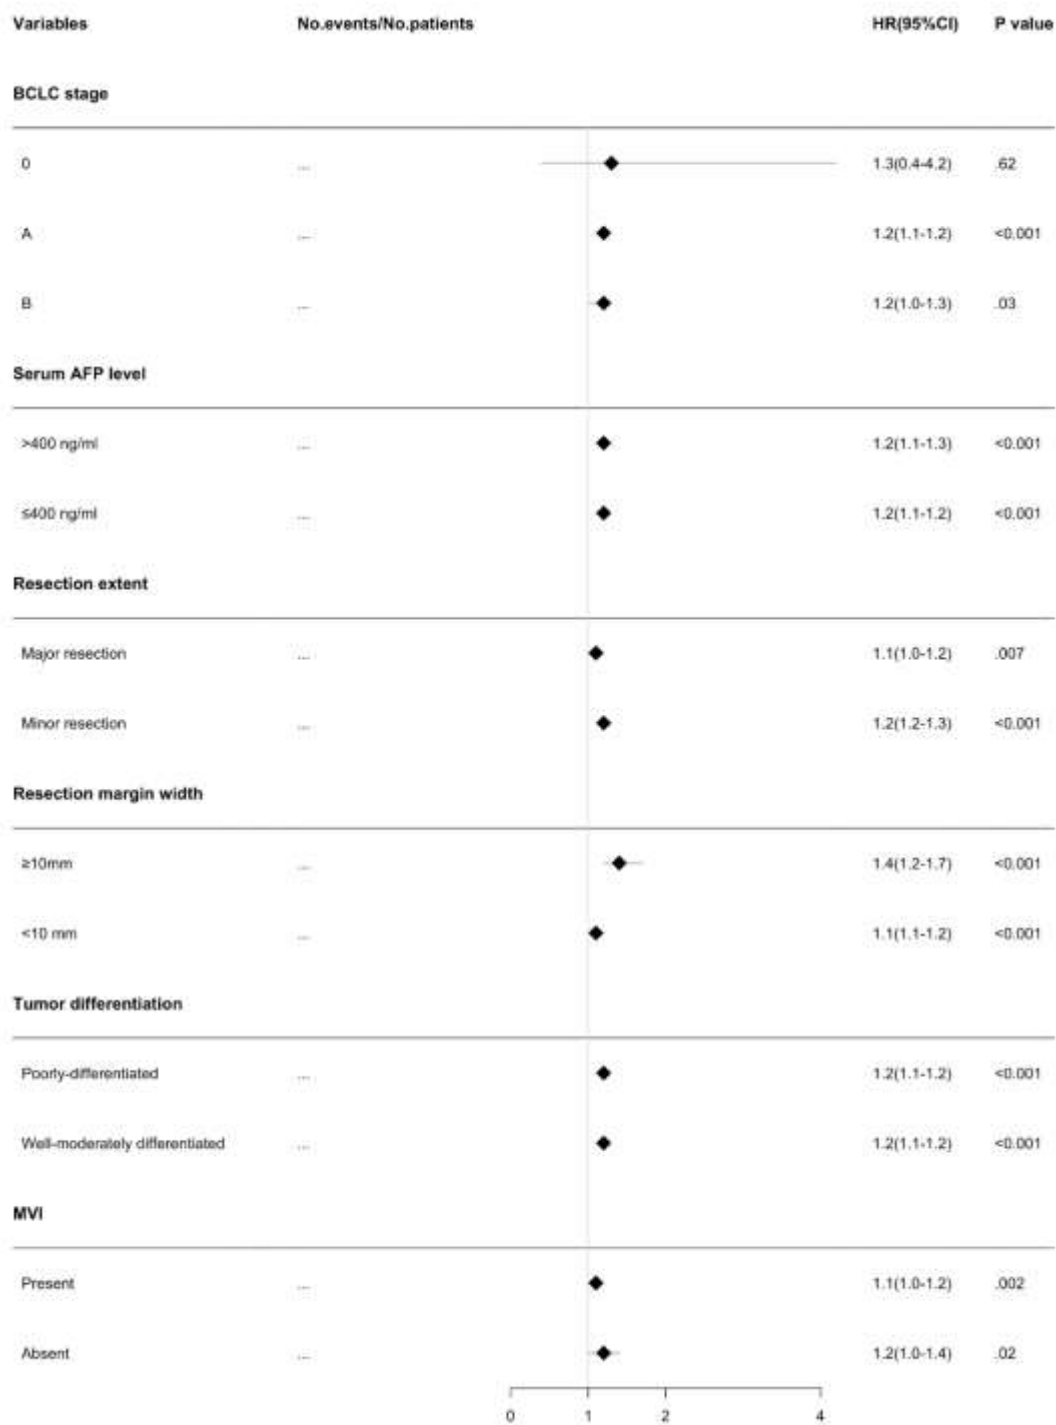

**Supplemental Figure 2.** Subgroup analyses for tumor size (cm) in predicting early recurrence-free survival based on six clinical-pathological prognostic factors.

BCLC, Barcelona Clinic Liver Cancer; AFP,  $\alpha$ -fetoprotein; MVI, microvascular invasion.

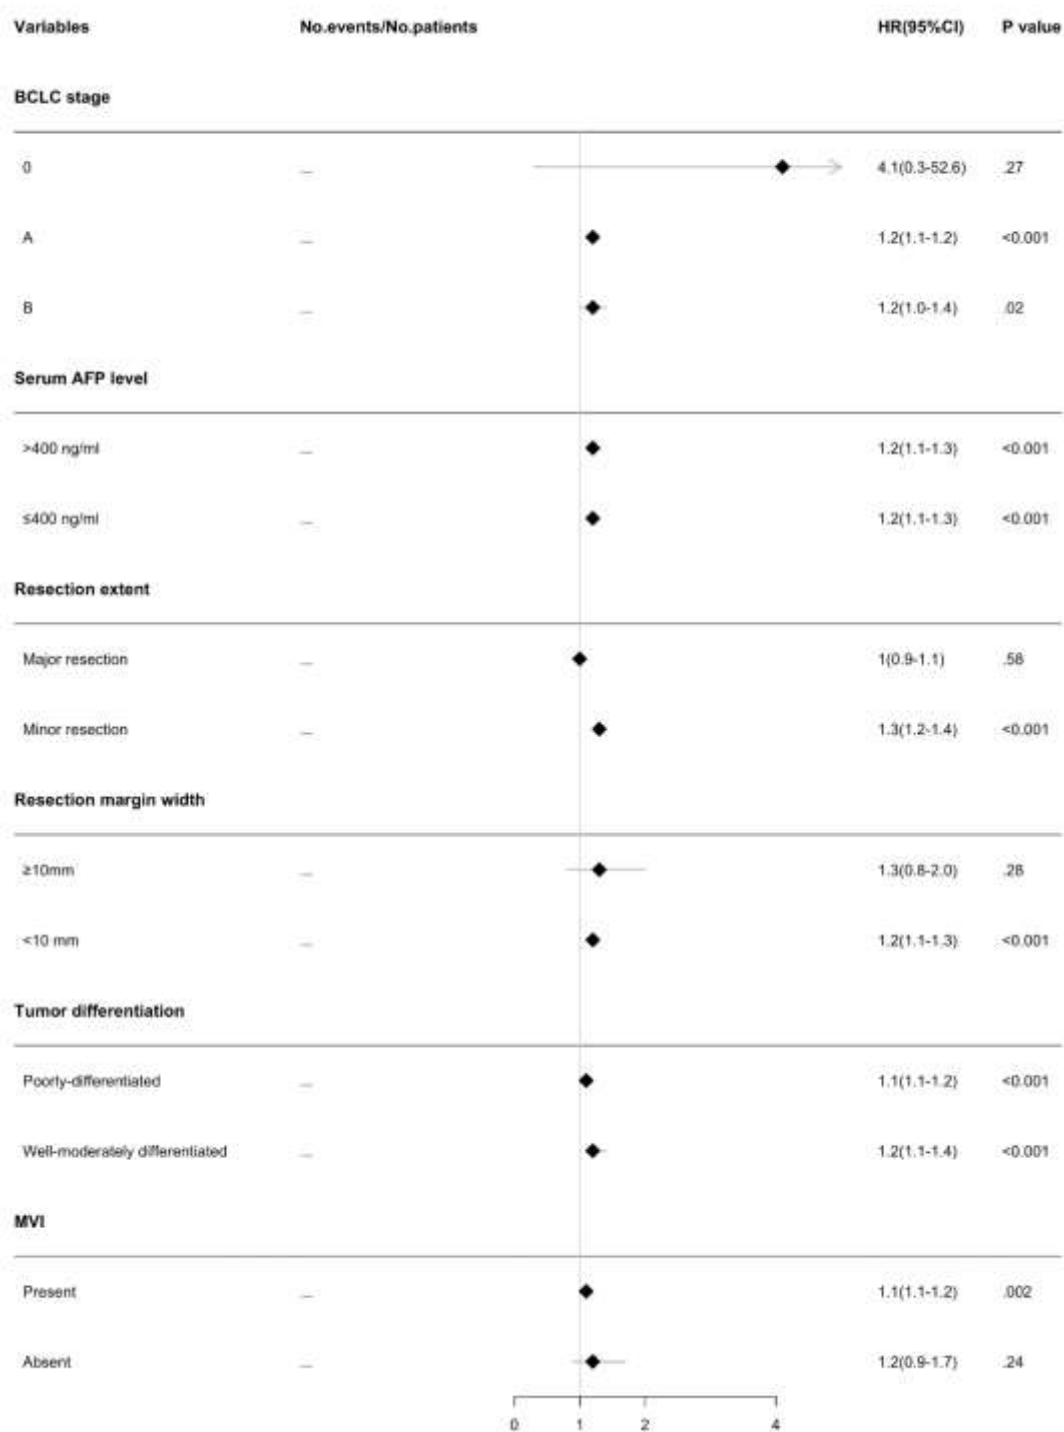

**Supplemental Figure 3.** Subgroup analyses for tumor size (cm) in predicting overall survival based on six clinical-pathological prognostic factors.

BCLC, Barcelona Clinic Liver Cancer; AFP,  $\alpha$ -fetoprotein; MVI, microvascular invasion.

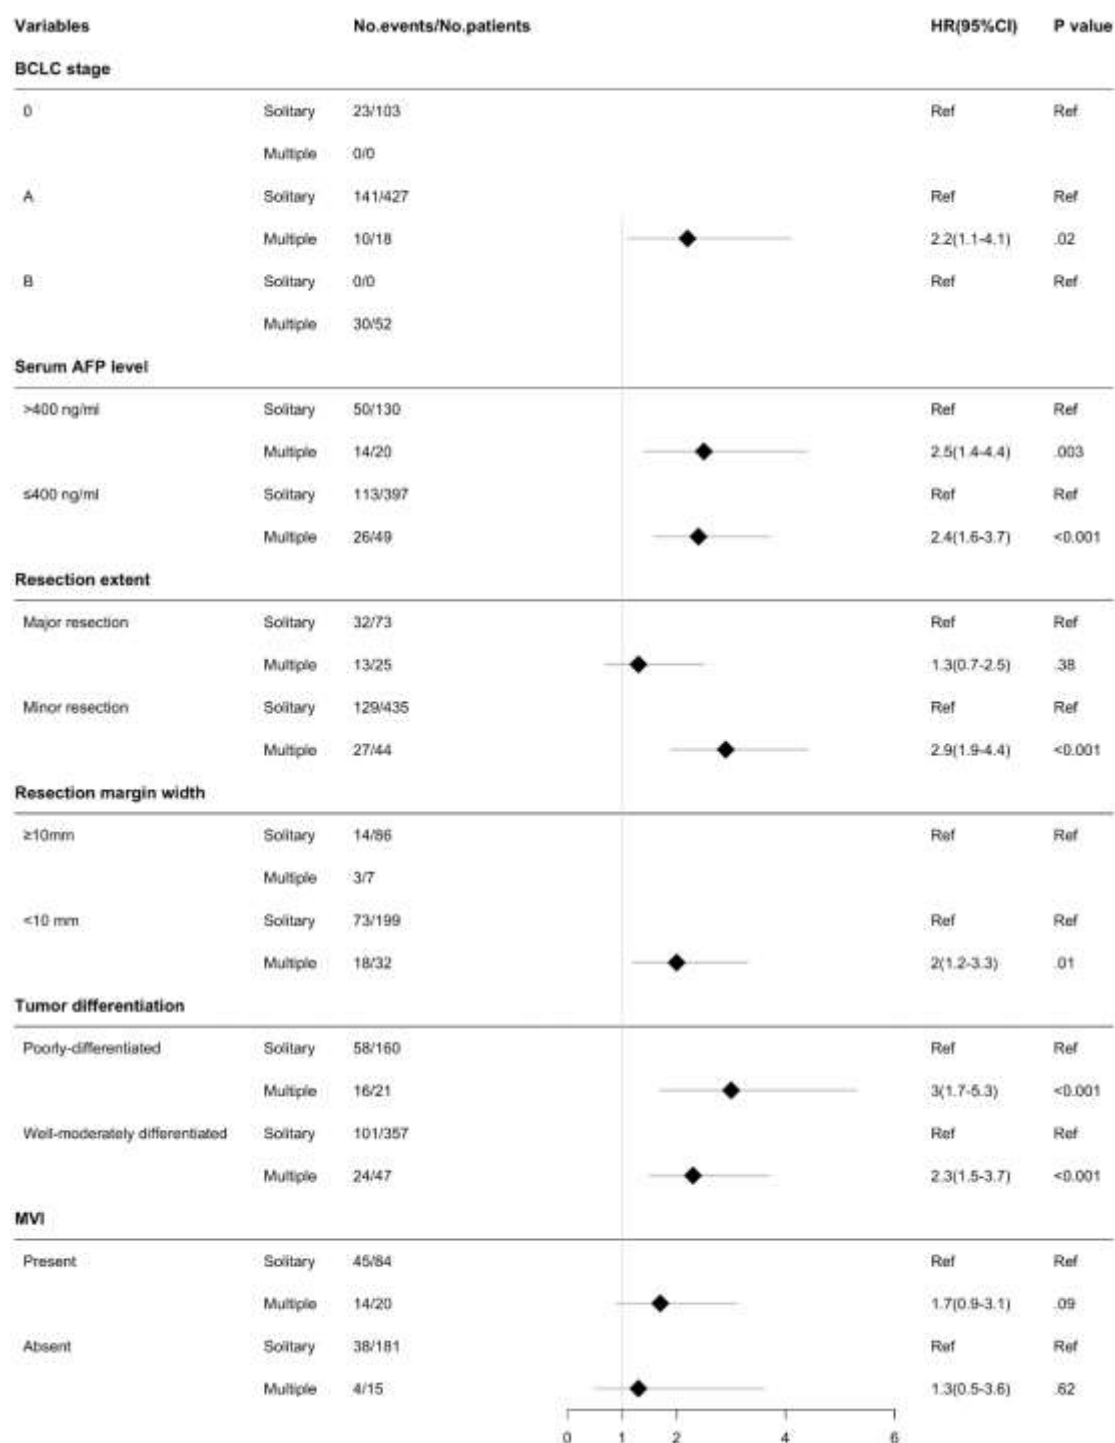

**Supplemental Figure 4.** Subgroup analyses for tumor number (solitary vs. multiple) in predicting early recurrence-free survival based on six clinical-pathological prognostic factors. BCLC, Barcelona Clinic Liver Cancer; AFP,  $\alpha$ -fetoprotein; MVI, microvascular invasion.

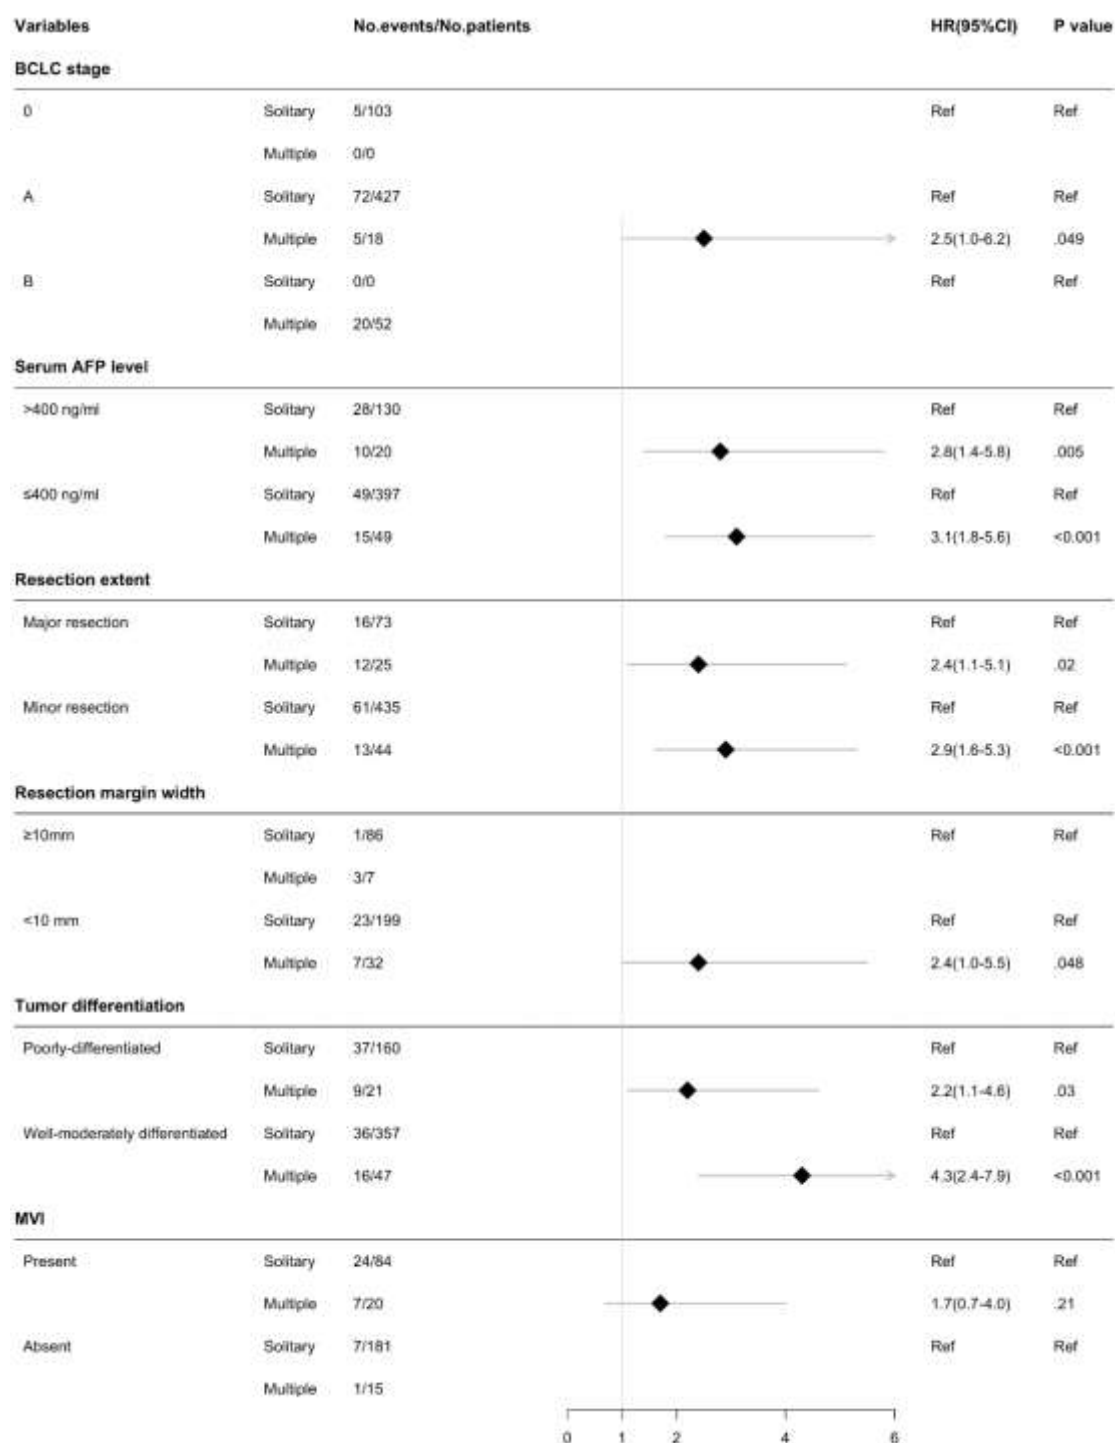

**Supplemental Figure 5.** Subgroup analyses for tumor number (solitary vs. multiple) in predicting overall survival based on six clinical-pathological prognostic factors.

BCLC, Barcelona Clinic Liver Cancer; AFP,  $\alpha$ -fetoprotein; MVI, microvascular invasion.

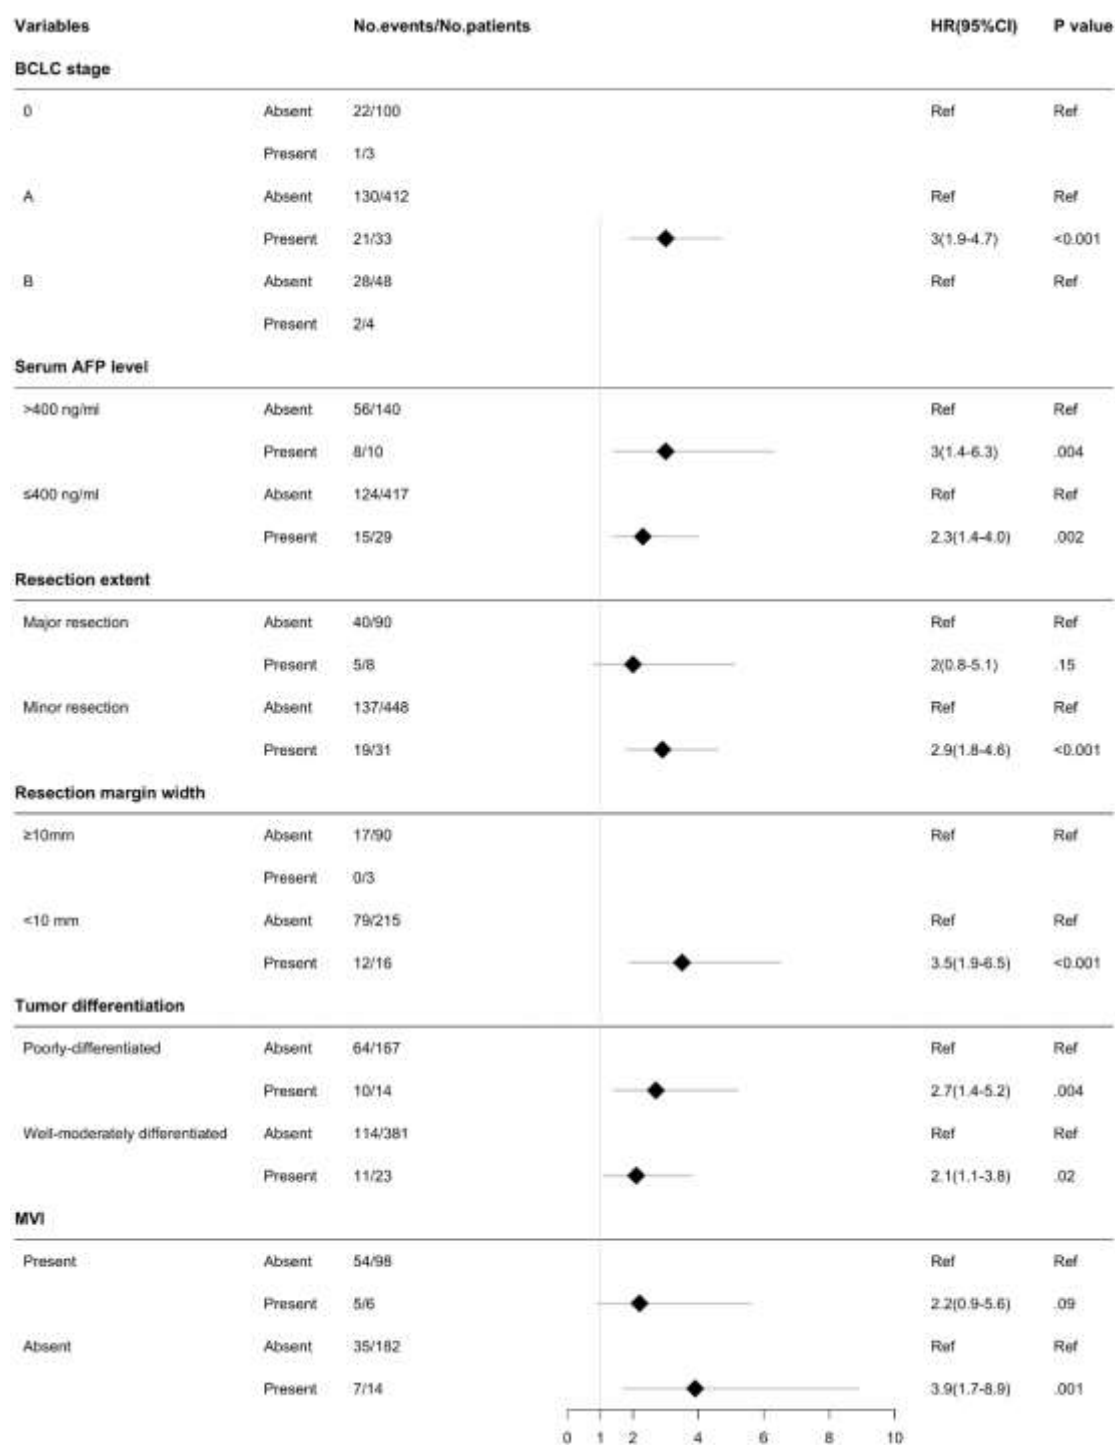

**Supplemental Figure 6.** Subgroup analyses for rim arterial phase hyperenhancement (present vs. absent) in predicting early recurrence-free survival based on six clinical-pathological prognostic factors.

BCLC, Barcelona Clinic Liver Cancer; AFP,  $\alpha$ -fetoprotein; MVI, microvascular invasion.

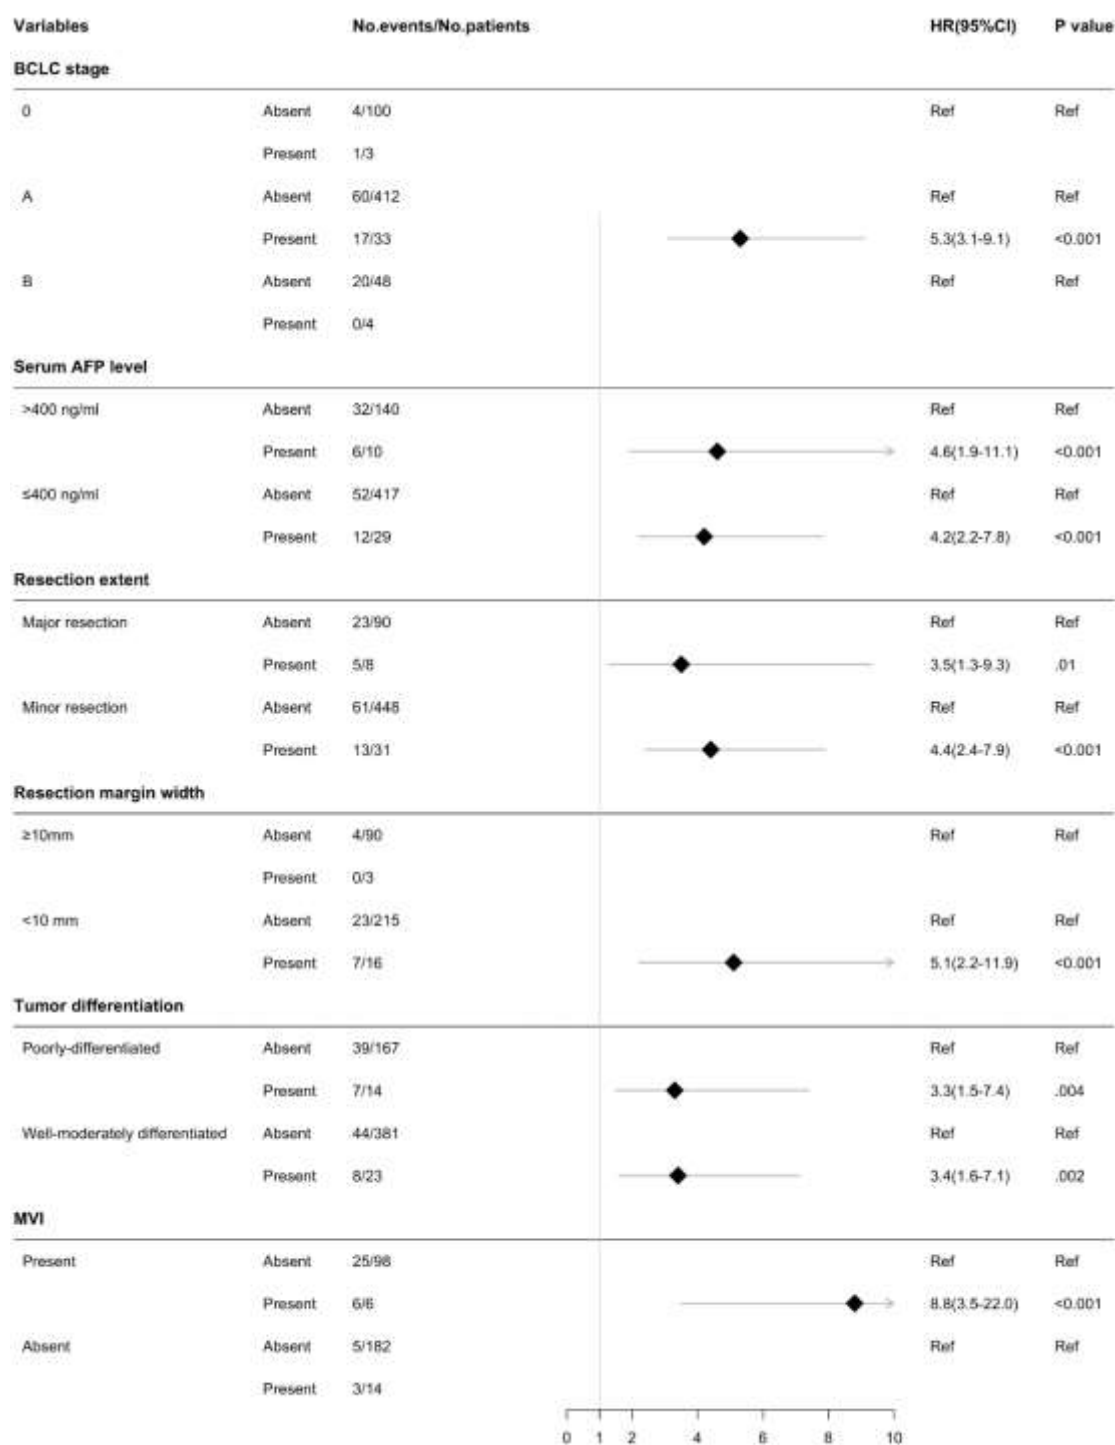

**Supplemental Figure 7.** Subgroup analyses for rim arterial phase hyperenhancement (present vs. absent) in predicting overall survival based on six clinical-pathological prognostic factors.

BCLC, Barcelona Clinic Liver Cancer; AFP,  $\alpha$ -fetoprotein; MVI, microvascular invasion.

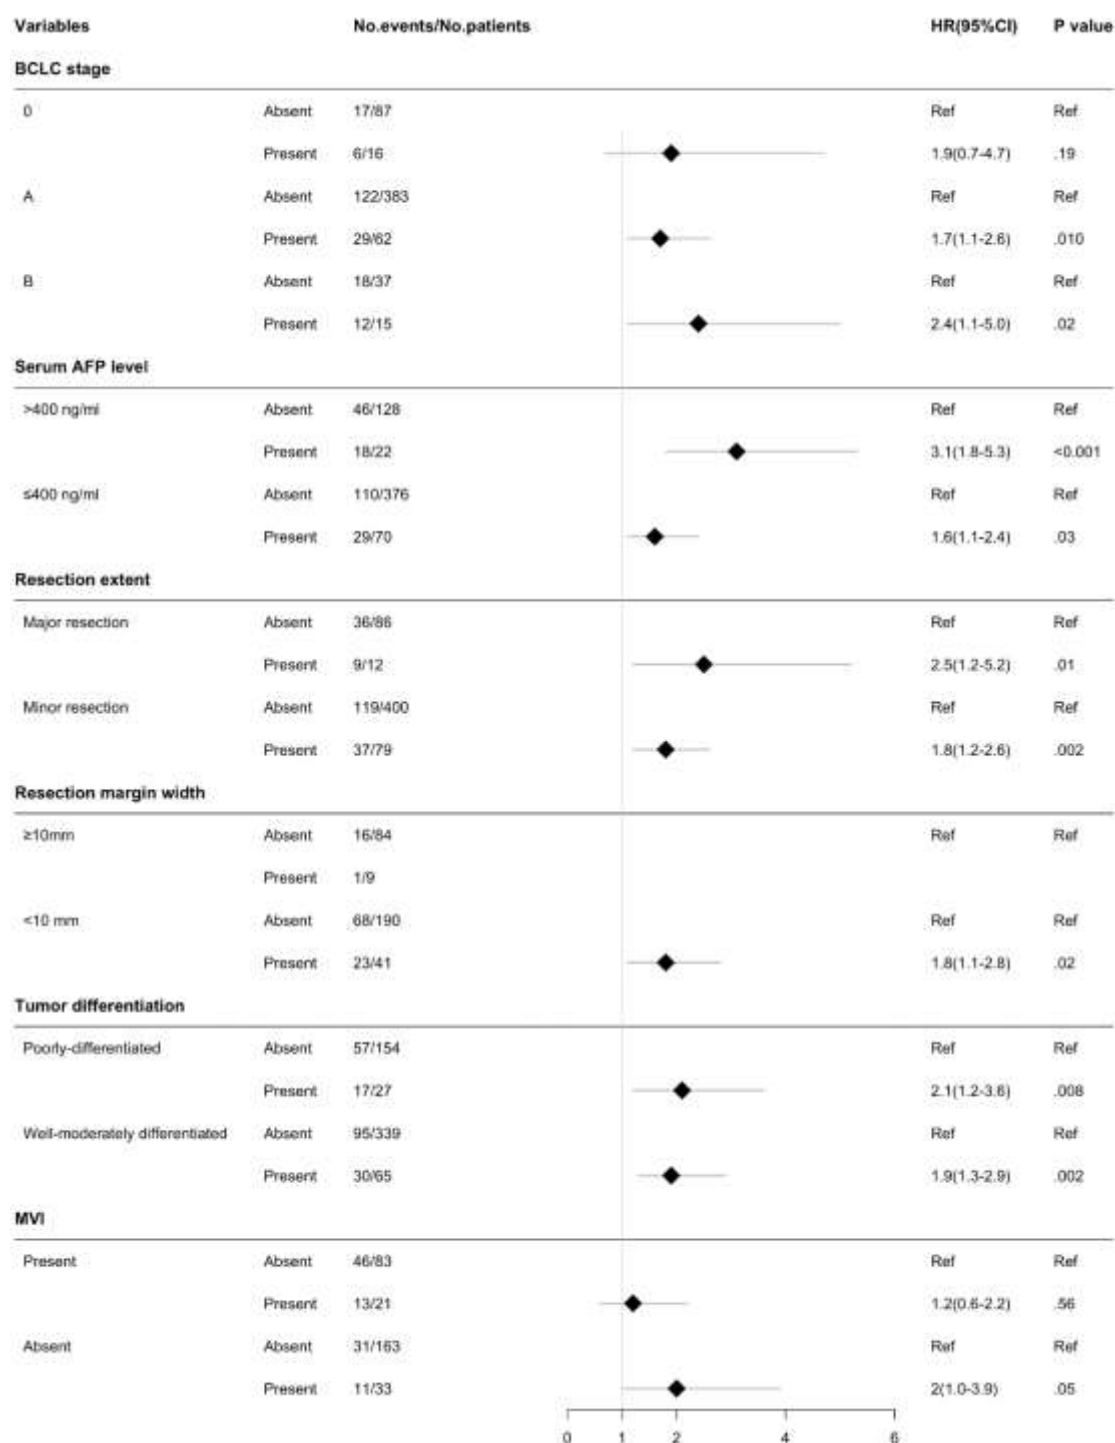

**Supplemental Figure 8.** Subgroup analyses for iron sparing in solid mass (present vs. absent) in predicting early recurrence-free survival based on six clinical-pathological prognostic factors.

BCLC, Barcelona Clinic Liver Cancer; AFP,  $\alpha$ -fetoprotein; MVI, microvascular invasion.

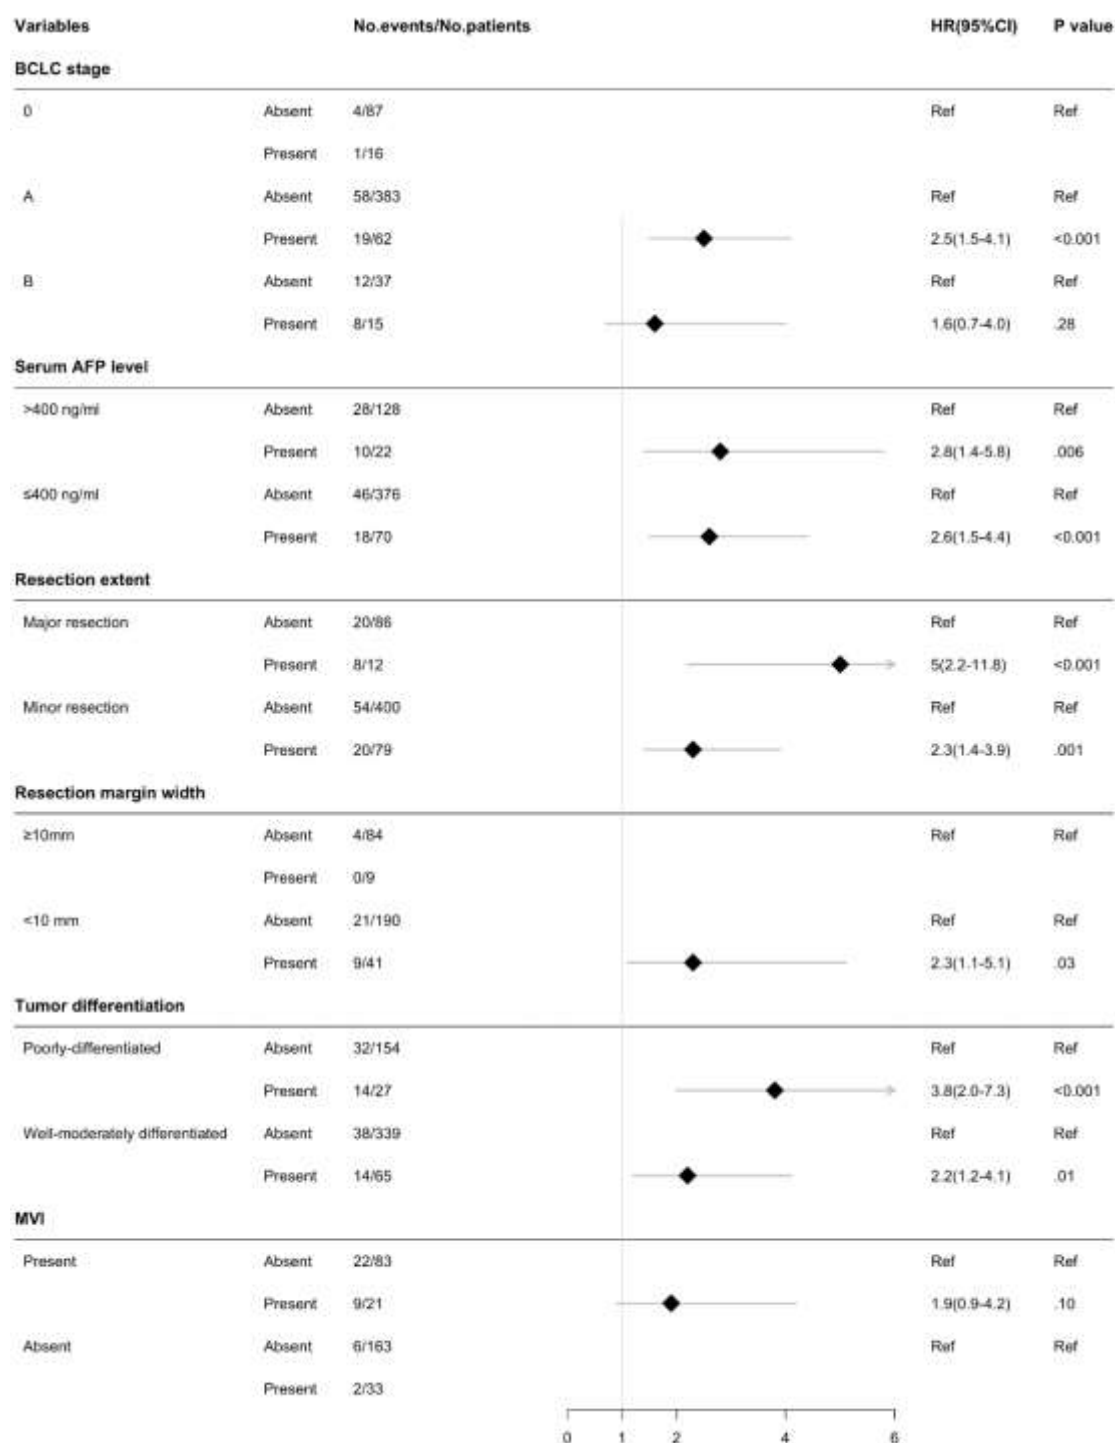

**Supplemental Figure 9.** Subgroup analyses for iron sparing in solid mass (present vs. absent) in predicting overall survival based on six clinical-pathological prognostic factors. BCLC, Barcelona Clinic Liver Cancer; AFP,  $\alpha$ -fetoprotein; MVI, microvascular invasion.

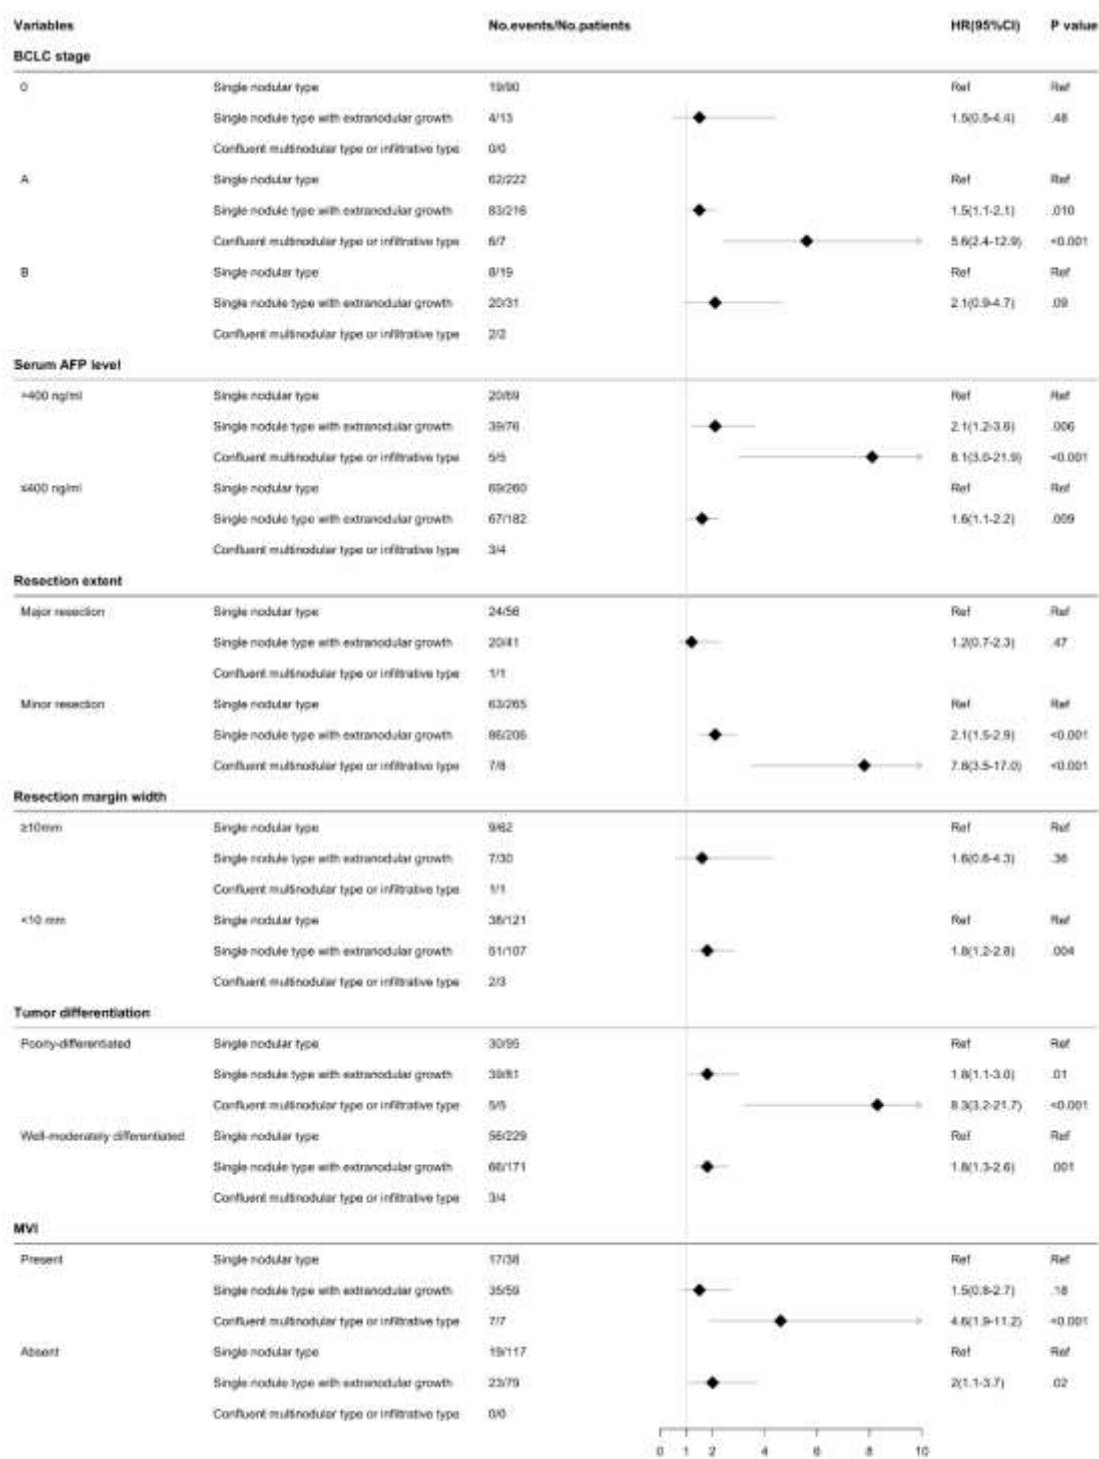

**Supplemental Figure 10.** Subgroup analyses for tumor growth subtype in predicting early recurrence-free survival based on six clinical-pathological prognostic factors.

BCLC, Barcelona Clinic Liver Cancer; AFP,  $\alpha$ -fetoprotein; MVI, microvascular invasion.

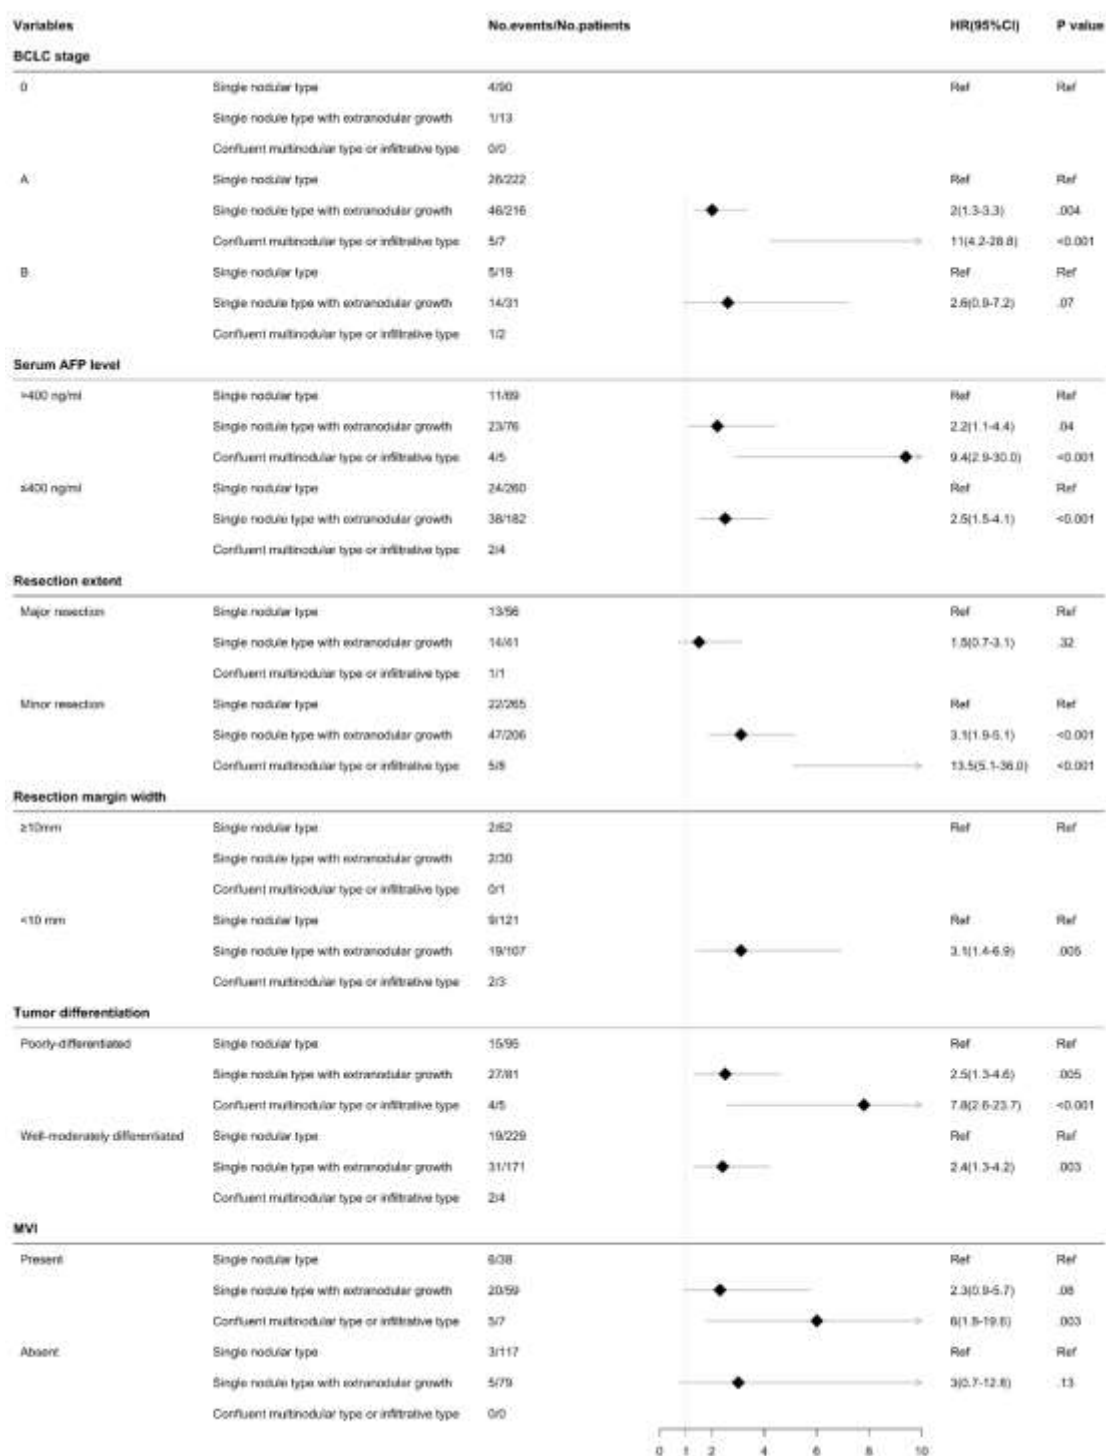

**Supplemental Figure 11.** Subgroup analyses for tumor growth subtype in predicting overall survival based on six clinical-pathological prognostic factors.

BCLC, Barcelona Clinic Liver Cancer; AFP,  $\alpha$ -fetoprotein; MVI, microvascular invasion.

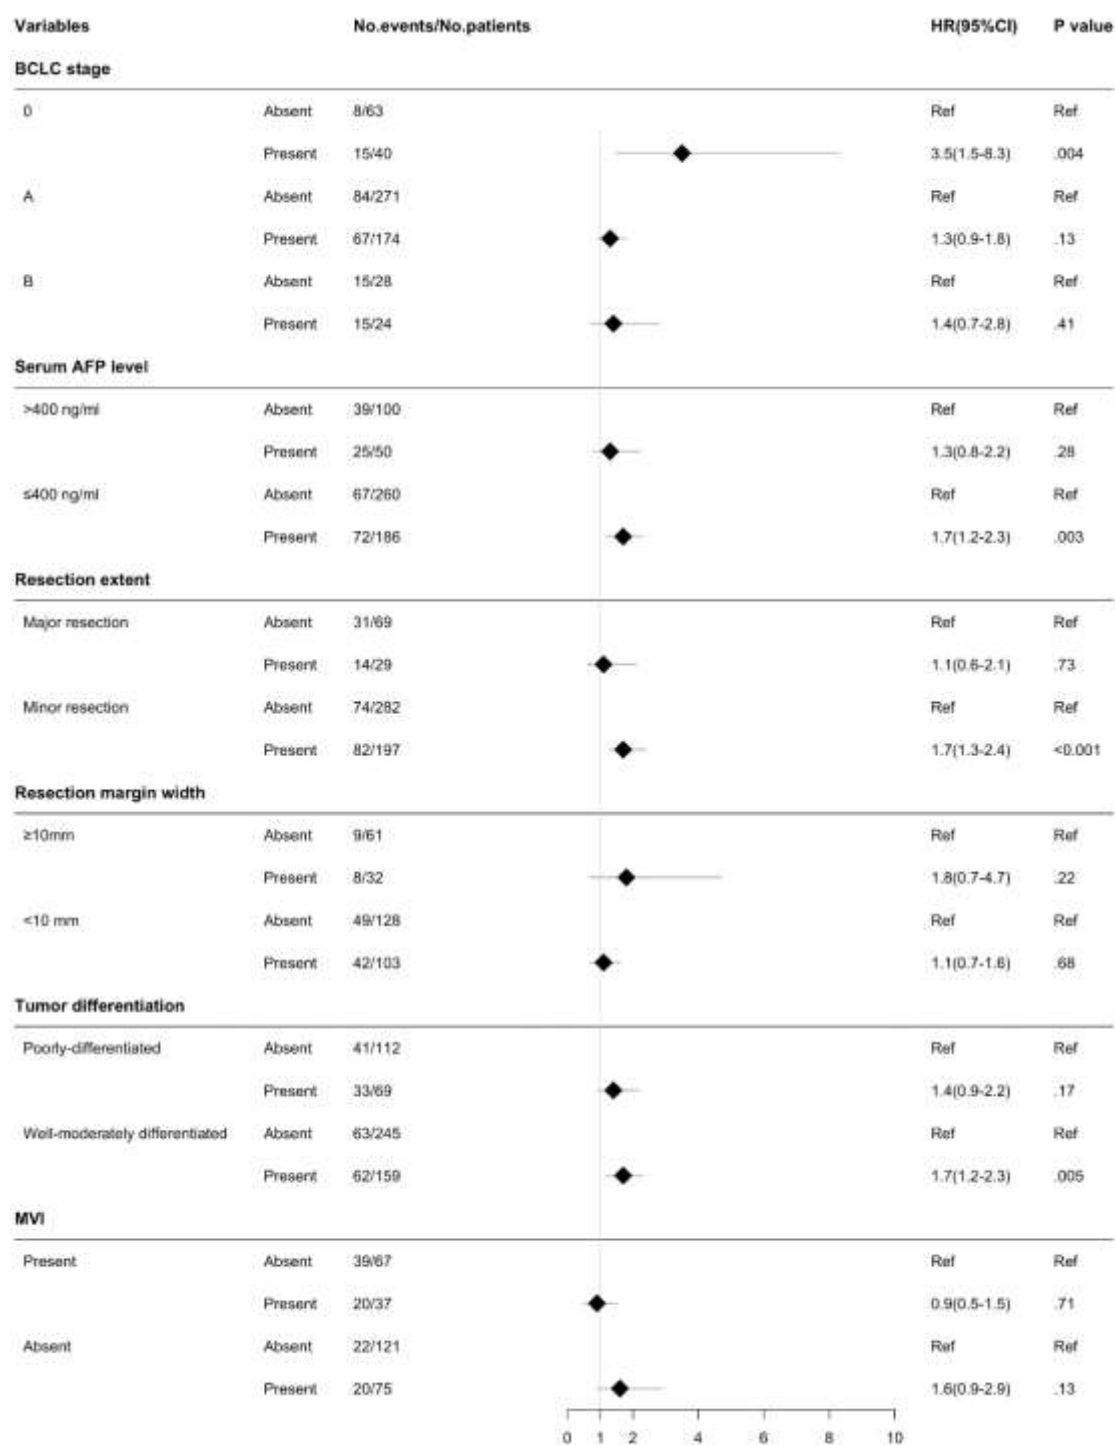

**Supplemental Figure 12.** Subgroup analyses for gastroesophageal varices (present vs. absent) in predicting early recurrence-free survival based on six clinical-pathological prognostic factors.

BCLC, Barcelona Clinic Liver Cancer; AFP,  $\alpha$ -fetoprotein; MVI, microvascular invasion.

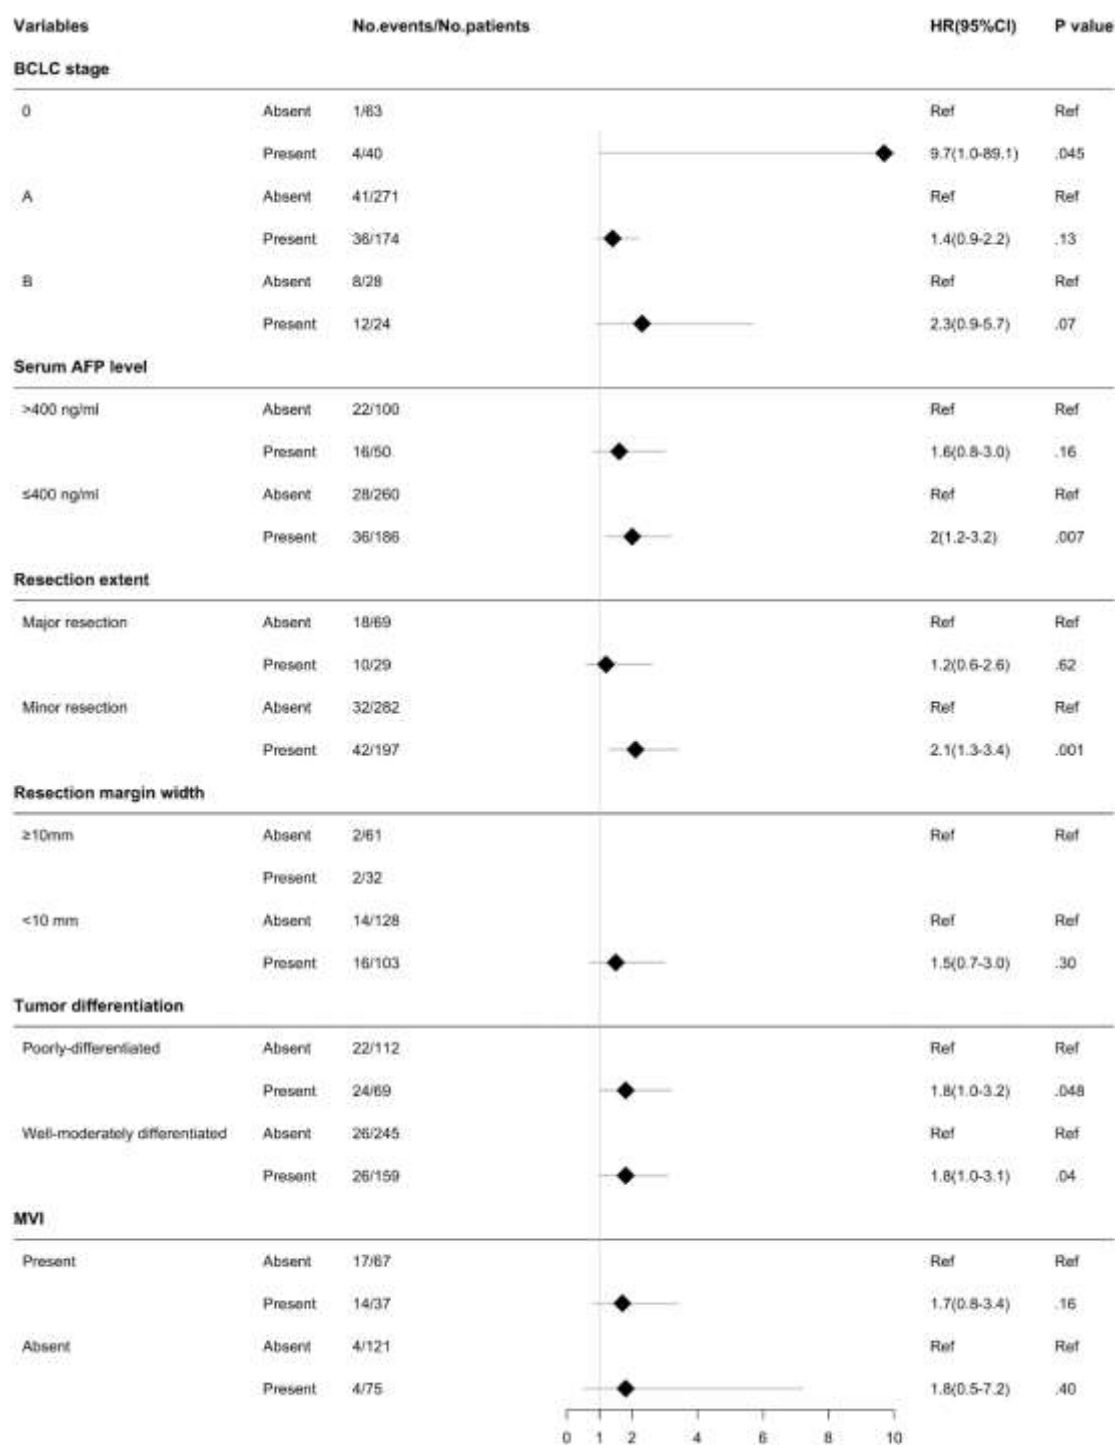

**Supplemental Figure 13.** Subgroup analyses for gastroesophageal varices (present vs. absent) in predicting overall survival based on six clinical-pathological prognostic factors. BCLC, Barcelona Clinic Liver Cancer; AFP,  $\alpha$ -fetoprotein; MVI, microvascular invasion.

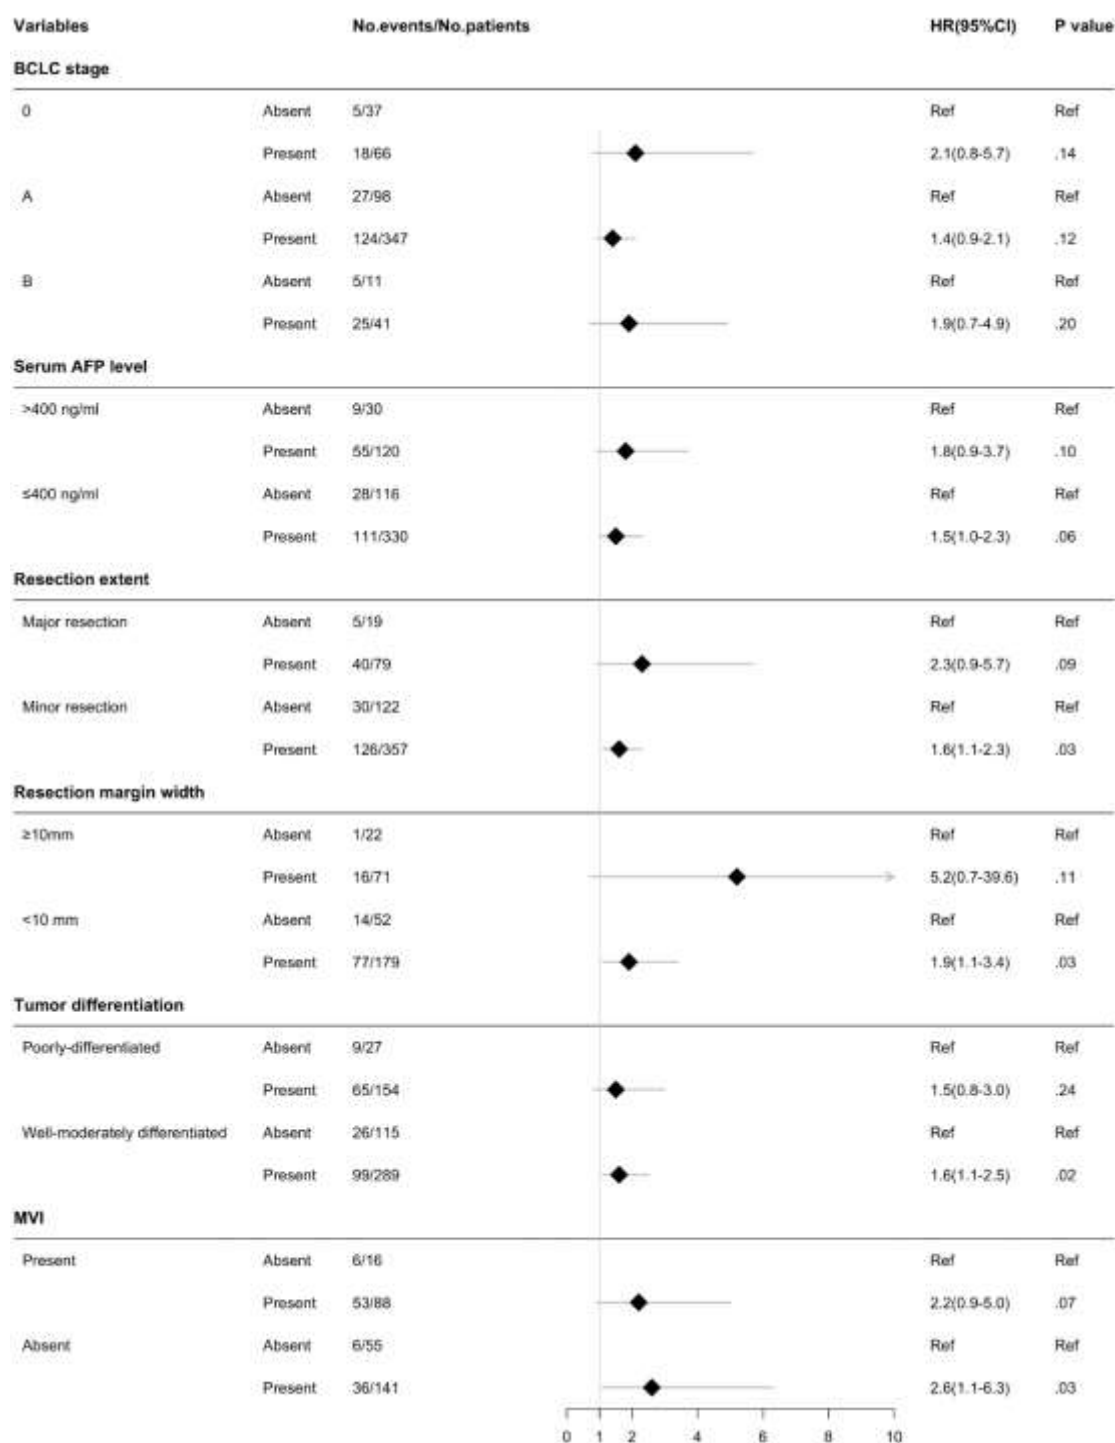

**Supplemental Figure 14.** Subgroup analyses for nonperipheral washout (present vs. absent) in predicting early recurrence-free survival based on six clinical-pathological prognostic factors.

BCLC, Barcelona Clinic Liver Cancer; AFP,  $\alpha$ -fetoprotein; MVI, microvascular invasion.

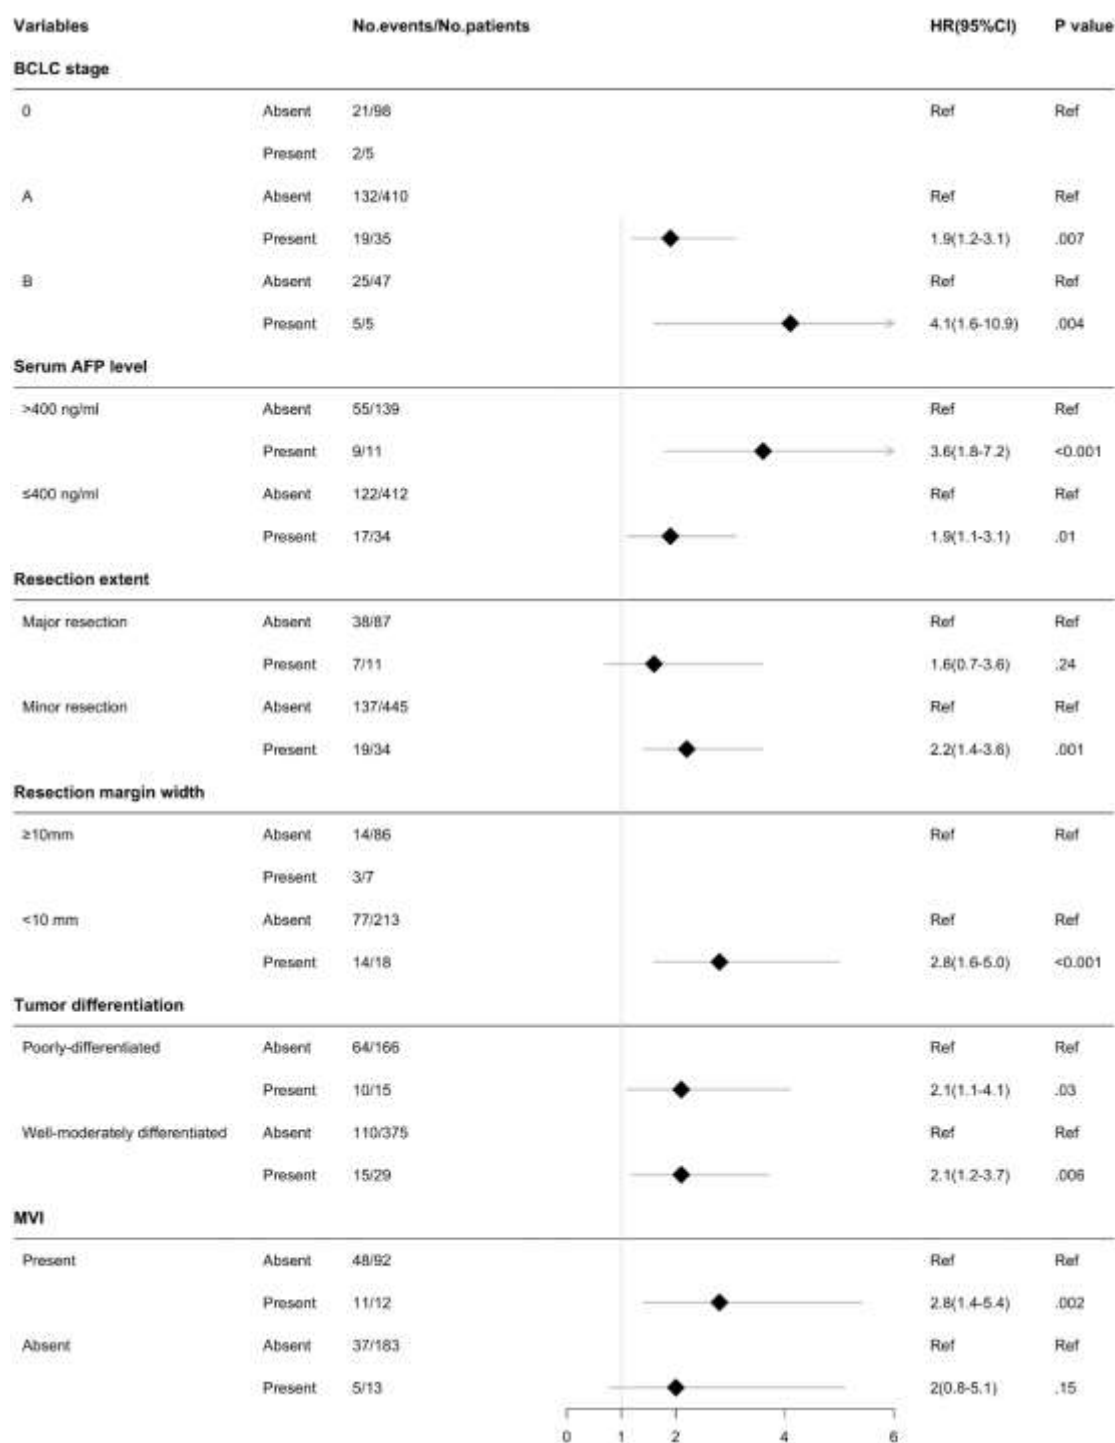

**Supplemental Figure 15.** Subgroup analyses for markedly low apparent diffusion coefficient value (present vs. absent) in predicting early recurrence-free survival based on six clinical-pathological prognostic factors.

BCLC, Barcelona Clinic Liver Cancer; AFP,  $\alpha$ -fetoprotein; MVI, microvascular invasion.

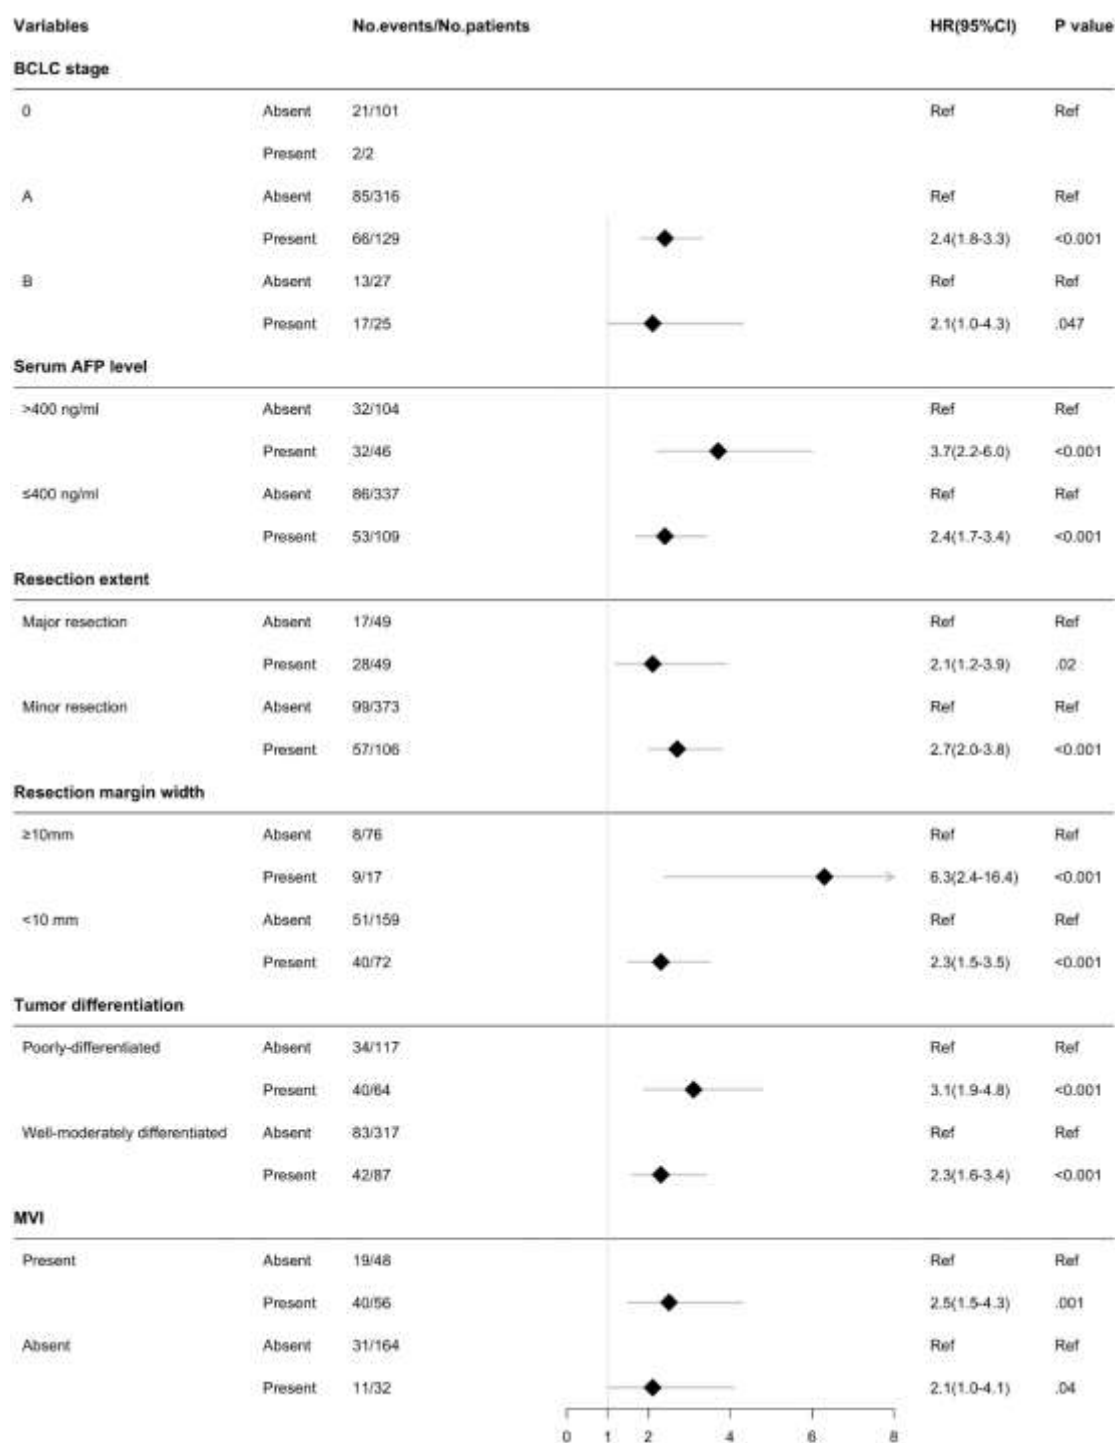

**Supplemental Figure 16.** Subgroup analyses for intratumoral artery (present vs. absent) in predicting early recurrence-free survival based on six clinical-pathological prognostic factors. BCLC, Barcelona Clinic Liver Cancer; AFP,  $\alpha$ -fetoprotein; MVI, microvascular invasion.

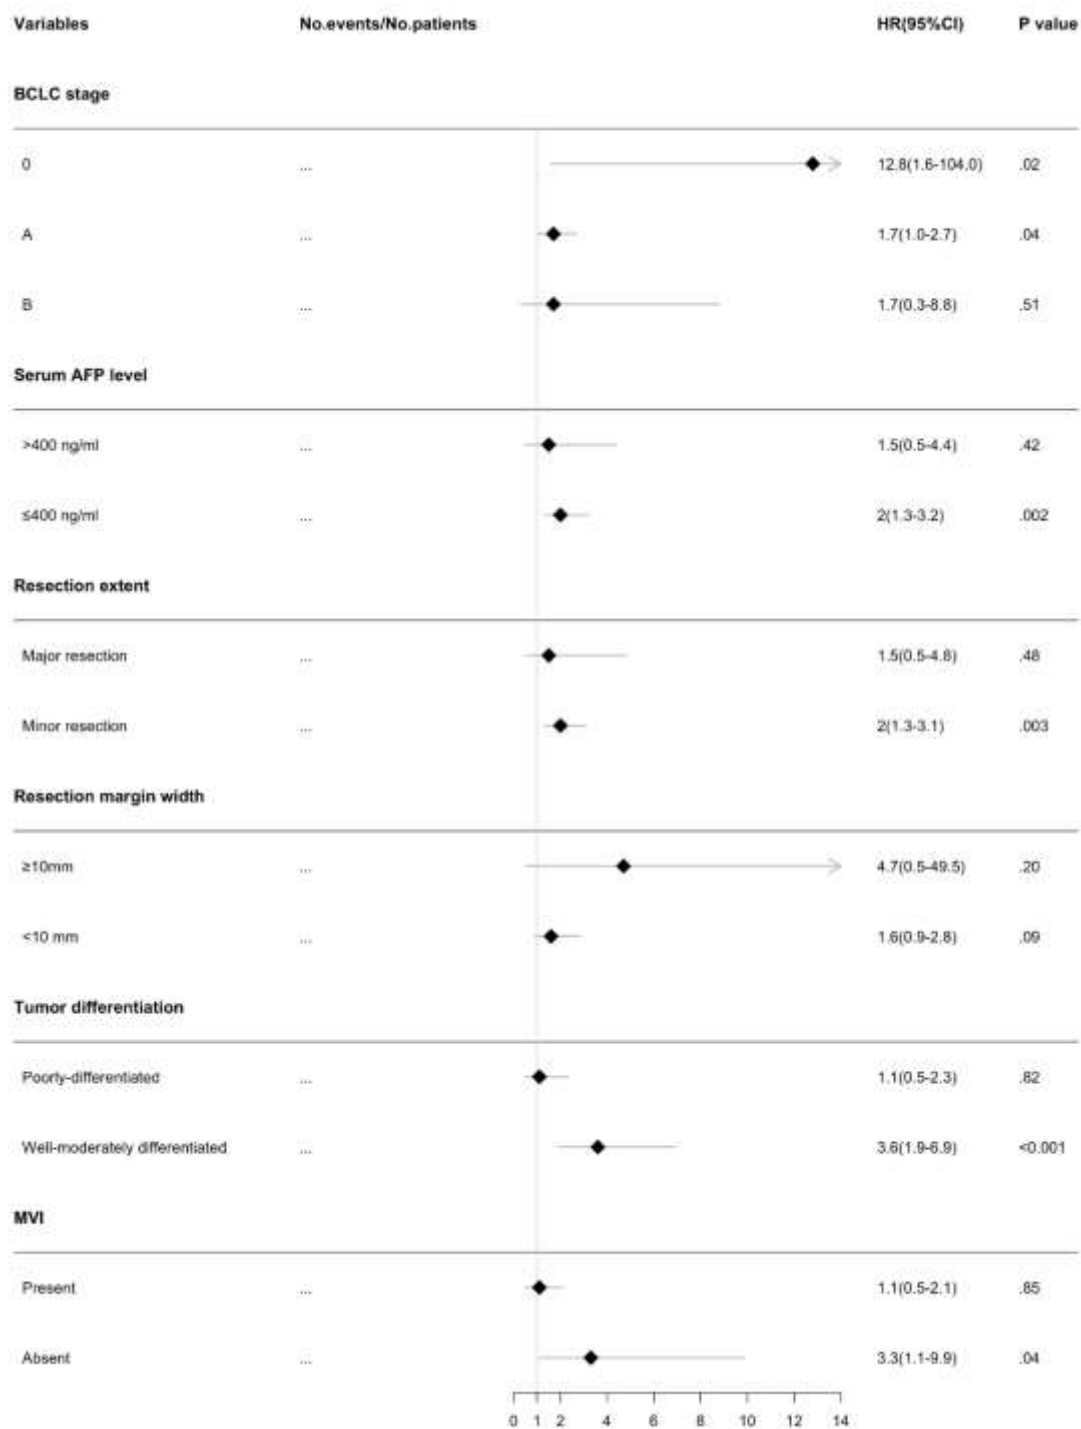

**Supplemental Figure 17.** Subgroup analyses for width of main portal vein (cm) in predicting early recurrence-free survival based on six clinical-pathological prognostic factors.

BCLC, Barcelona Clinic Liver Cancer; AFP,  $\alpha$ -fetoprotein; MVI, microvascular invasion.

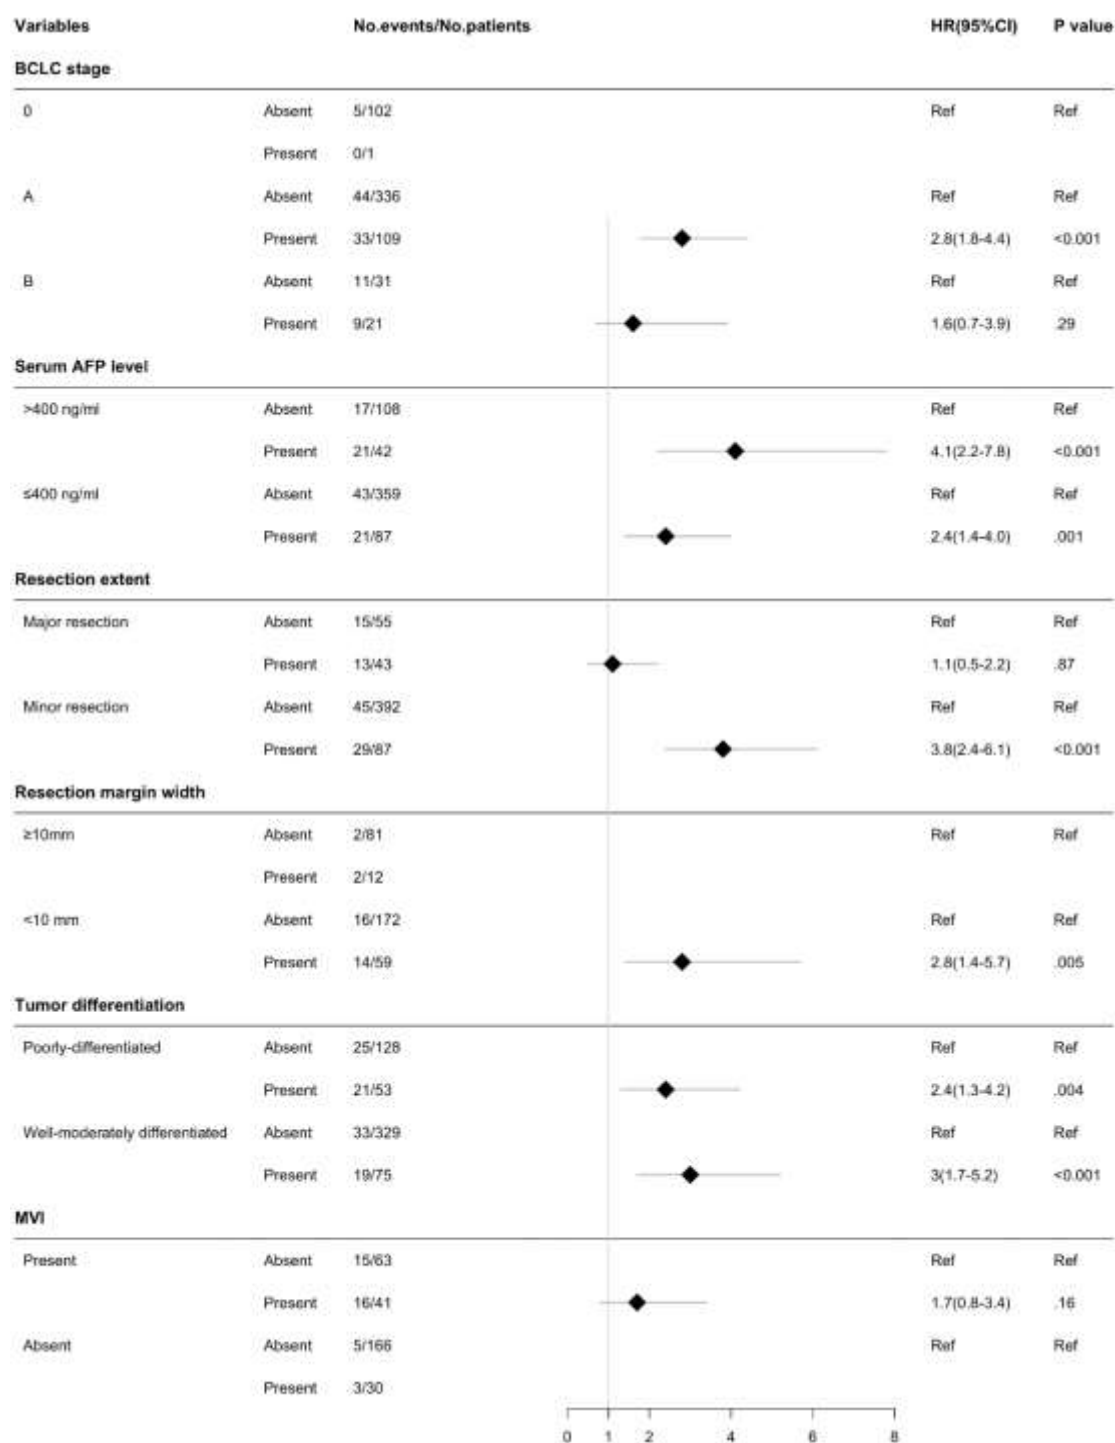

**Supplemental Figure 18.** Subgroup analyses for the VICT2 trait (present vs. absent) in predicting overall survival based on six clinical-pathological prognostic factors.

BCLC, Barcelona Clinic Liver Cancer; AFP,  $\alpha$ -fetoprotein; MVI, microvascular invasion.
